# Supplementary material for: Deprotometalation-Iodolysis and Direct Iodination of 1-Arylated 7-Azaindoles: Reactivity Studies and Molecule Properties
Source: MDPI journal article supplement (doi:10.3390/molecules26206314), 2021-10-19

# Supplementary Materials

## Deprotometalation-iodolysis and direct iodination of 1-arylated 7-azaindoles: Reactivity studies and molecule properties

Mohamed Yacine Ameer Messaoud <sup>1,2</sup>, Ghenia Bentabed-Ababsa <sup>2,\*</sup>, Ziad Fajloun <sup>3,4,\*</sup>,  
Monzer Hamze <sup>5</sup>, Yury S. Halauko <sup>6,\*</sup>, Oleg A. Ivashkevich <sup>7</sup>, Vadim E. Matulis <sup>7</sup>,  
Thierry Roisnel <sup>1</sup>, Vincent Dorcet <sup>1</sup> and Florence Mongin <sup>1,\*</sup>

<sup>1</sup> Univ Rennes, CNRS, ISCR (Institut des Sciences Chimiques de Rennes) - UMR 6226,  
F-35000 Rennes, France

<sup>2</sup> Laboratoire de Synthèse Organique Appliquée, Faculté des Sciences Exactes et Appliquées,  
Université d'Oran 1 Ahmed Ben Bella, BP 1524 El M'Naouer, 31000 Oran, Algeria

<sup>3</sup> Laboratory of Applied Biotechnology (LBA3B), Azm Center for Research in Biotechnology and its  
Applications, EDST, Lebanese University, 1300 Tripoli, Lebanon

<sup>4</sup> Faculty of Sciences 3, Lebanese University, Campus Michel Slayman 1352 Ras Maska – Tripoli,  
Lebanon

<sup>5</sup> Laboratoire Microbiologie, Santé et Environnement (LMSE), Doctoral School of Sciences and  
Technology, Faculty of Public Health, Lebanese University, 1300 Tripoli, Lebanon

<sup>6</sup> UNESCO Chair of Belarusian State University, Minsk 220030, Belarus

<sup>7</sup> Research Institute for Physico-Chemical Problems of Belarusian State University, Minsk 220030,  
Belarus

bentabedg@gmail.com (G. Bentabed-Ababsa); ziad.fajloun@ul.edu.lb (Z. Fajloun);

hys@tut.by (Y. S. Halauko); florence.mongin@univ-rennes1.fr (F. Mongin)

|                                                                                                                                                                                                                      |                                      |
|----------------------------------------------------------------------------------------------------------------------------------------------------------------------------------------------------------------------|--------------------------------------|
| NMR data of compounds <b>2k</b> , <b>2k'</b> , <b>3a</b> , <b>3a'</b> , <b>3e-g</b> , <b>3g'</b> , <b>3k</b> , <b>3k'</b> , <b>3k''</b> , <b>4b-f</b> , <b>4h</b> , <b>4i</b> , <b>5e</b> , <b>5i</b> and <b>6g'</b> | p. SM2                               |
| Calculated values of the Gibbs energies $\Delta G_{\text{acid}}$ for deprotonation                                                                                                                                   | p. SM33                              |
| Cartesian coordinates of molecular geometry for the most stable rotamer form optimized at the B3LYP/6-31G(d) level of theory                                                                                         | see separate file in the .xyz format |

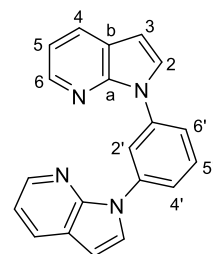

# **1,1'-(1,3-Phenylene)bis(1*H*-pyrrolo[2,3-*b*]pyridine) (2k)**

<sup>1</sup>H NMR (300 MHz, CDCl<sub>3</sub>)

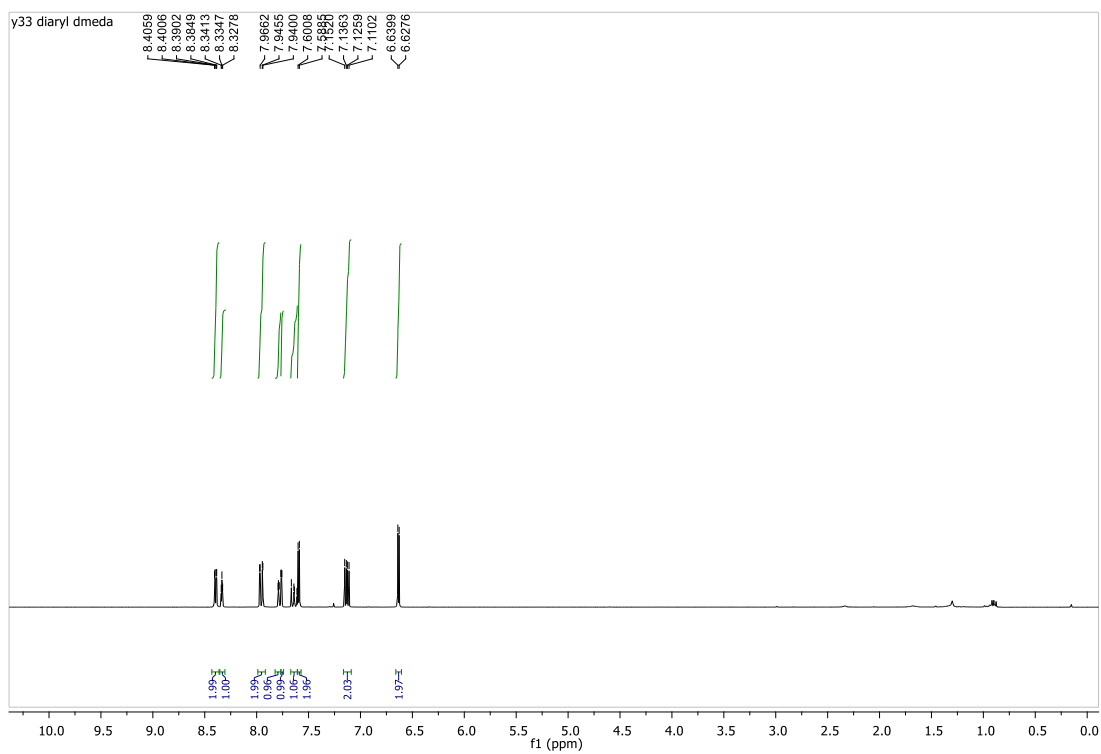

<sup>13</sup>C NMR (75 MHz, CDCl<sub>3</sub>)

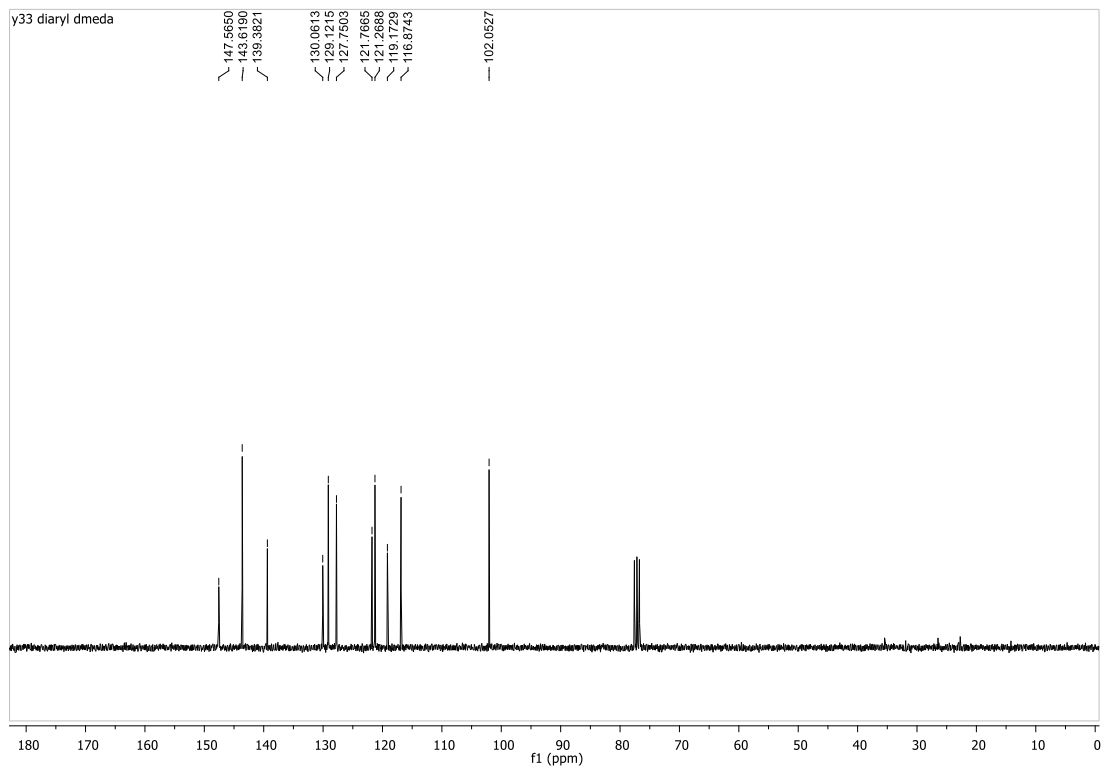

# 1-(3-Iodophenyl)-1*H*-pyrrolo[2,3-*b*]pyridine (2k')

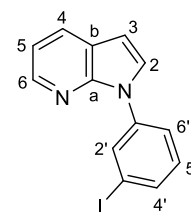

$^1\text{H}$  NMR (300 MHz,  $\text{CDCl}_3$ )

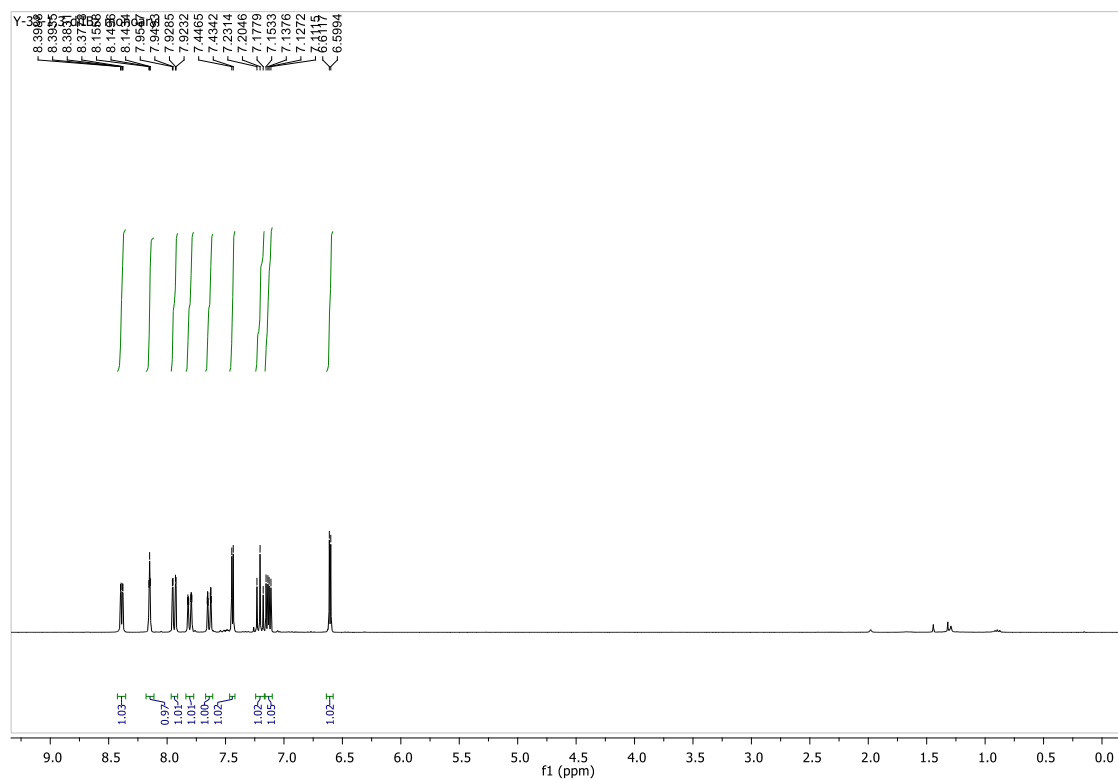

$^{13}\text{C}$  NMR (75 MHz,  $\text{CDCl}_3$ )

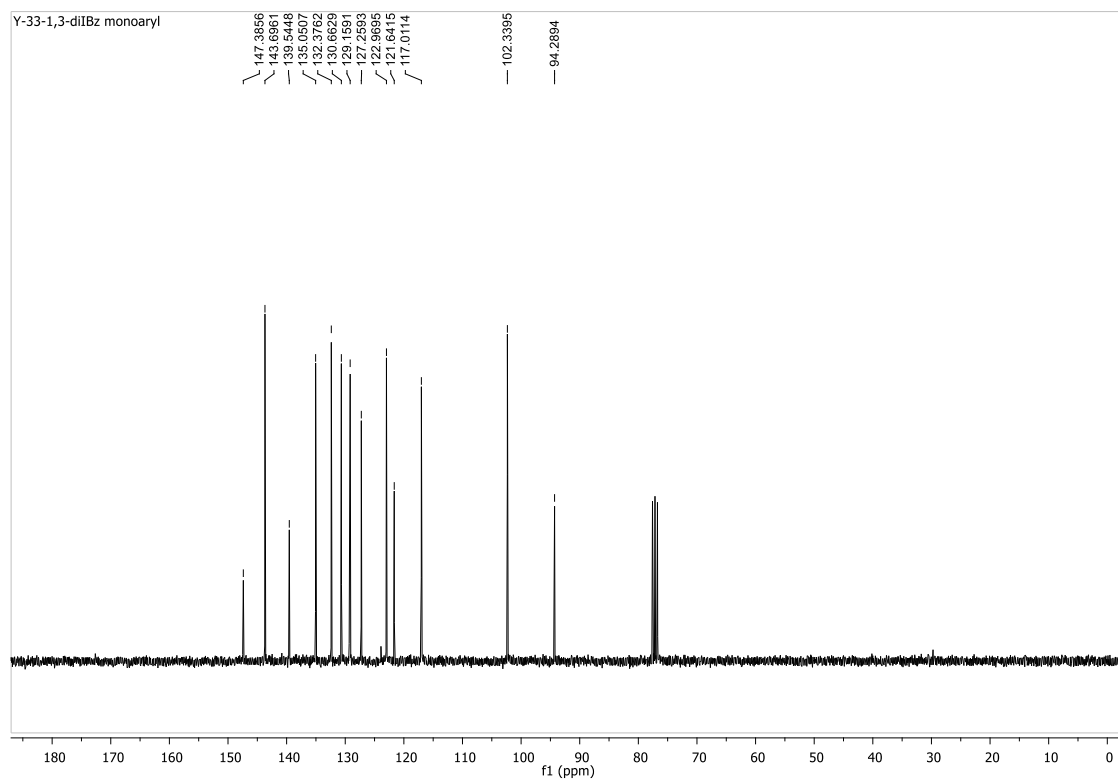

## 2-Iodo-1-phenyl-1*H*-pyrrolo[2,3-*b*]pyridine (3a)

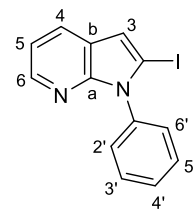

$^1\text{H}$  NMR (300 MHz,  $\text{CDCl}_3$ )

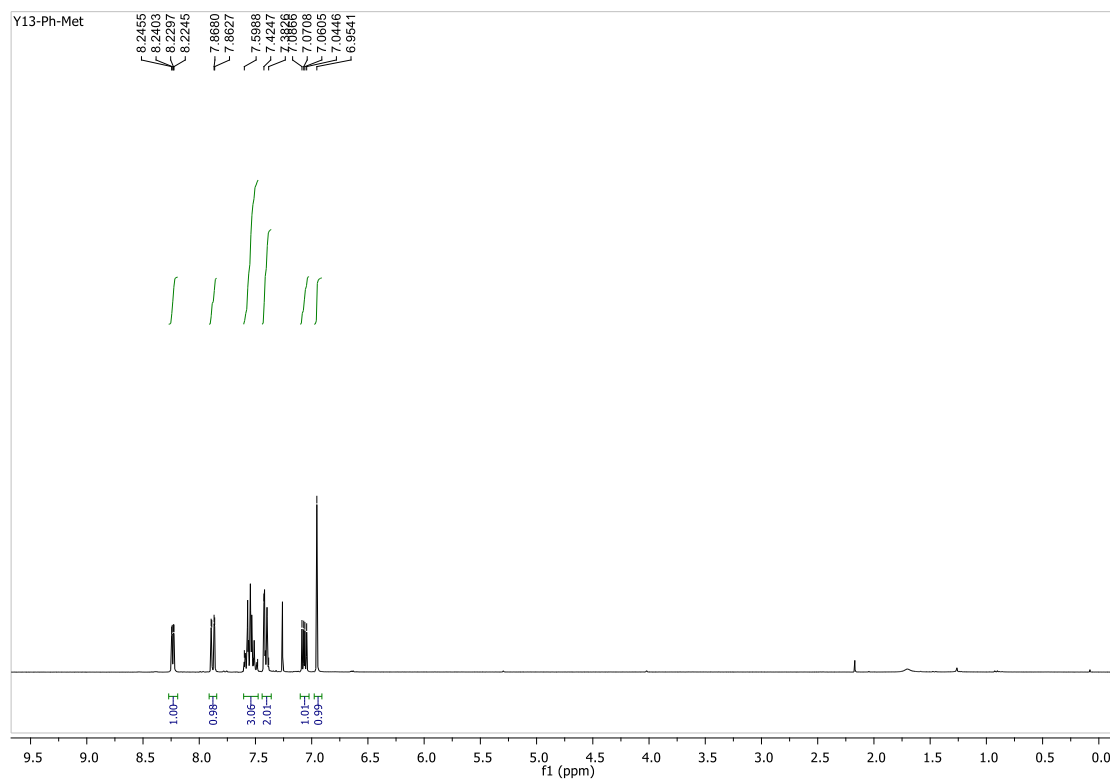

$^{13}\text{C}$  NMR (75 MHz,  $\text{CDCl}_3$ )

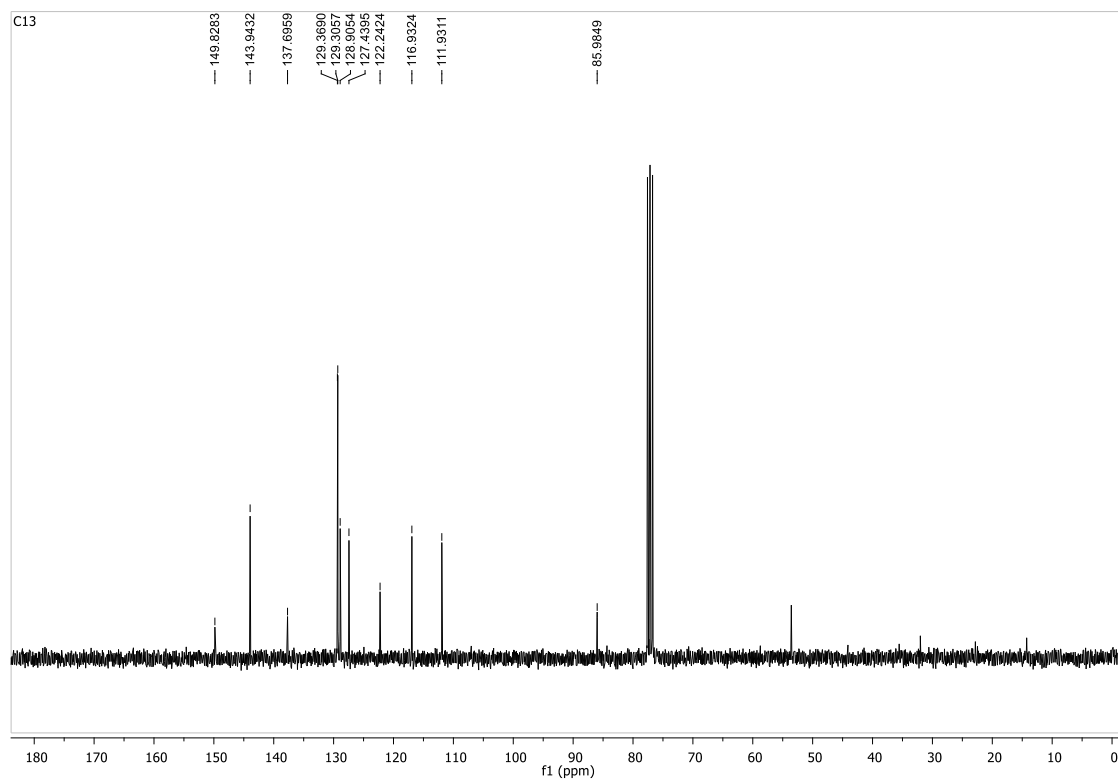

## 2-Iodo-1-(2-iodophenyl)-1*H*-pyrrolo[2,3-*b*]pyridine (3a')

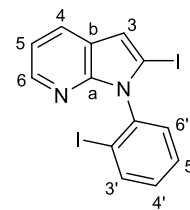

$^1\text{H}$  NMR (300 MHz,  $\text{CDCl}_3$ )

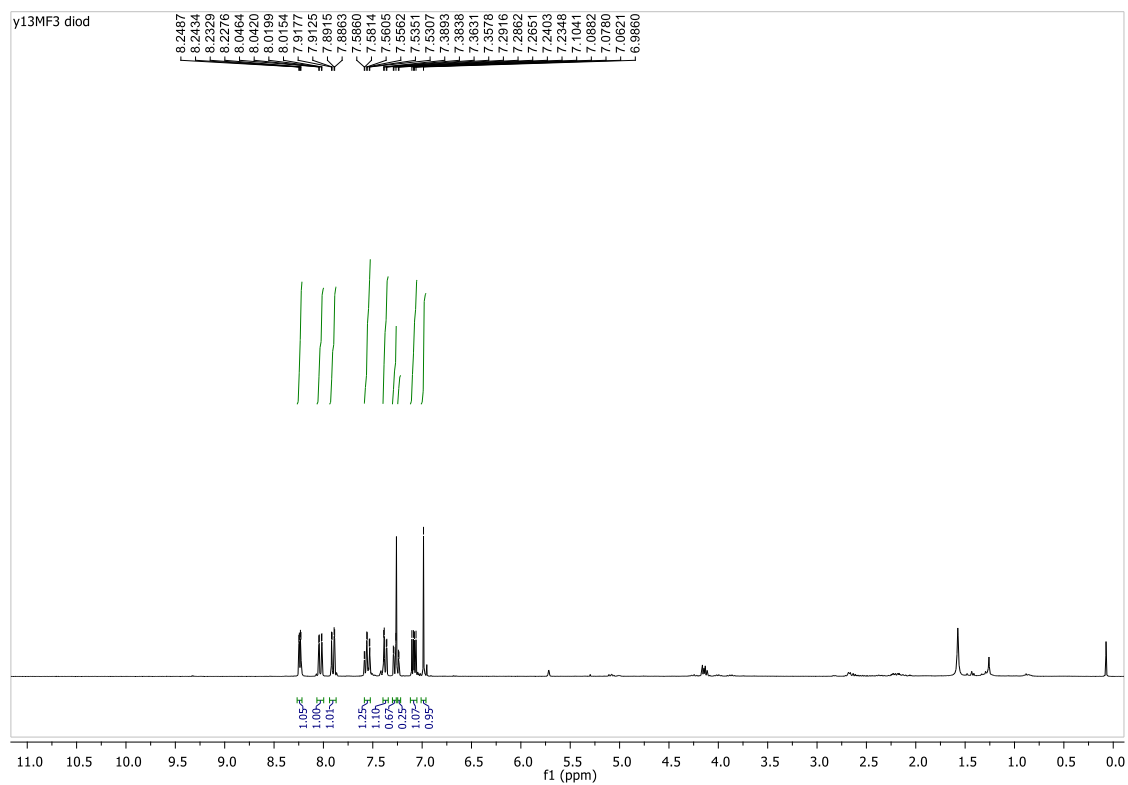

$^{13}\text{C}$  NMR (75 MHz,  $\text{CDCl}_3$ )

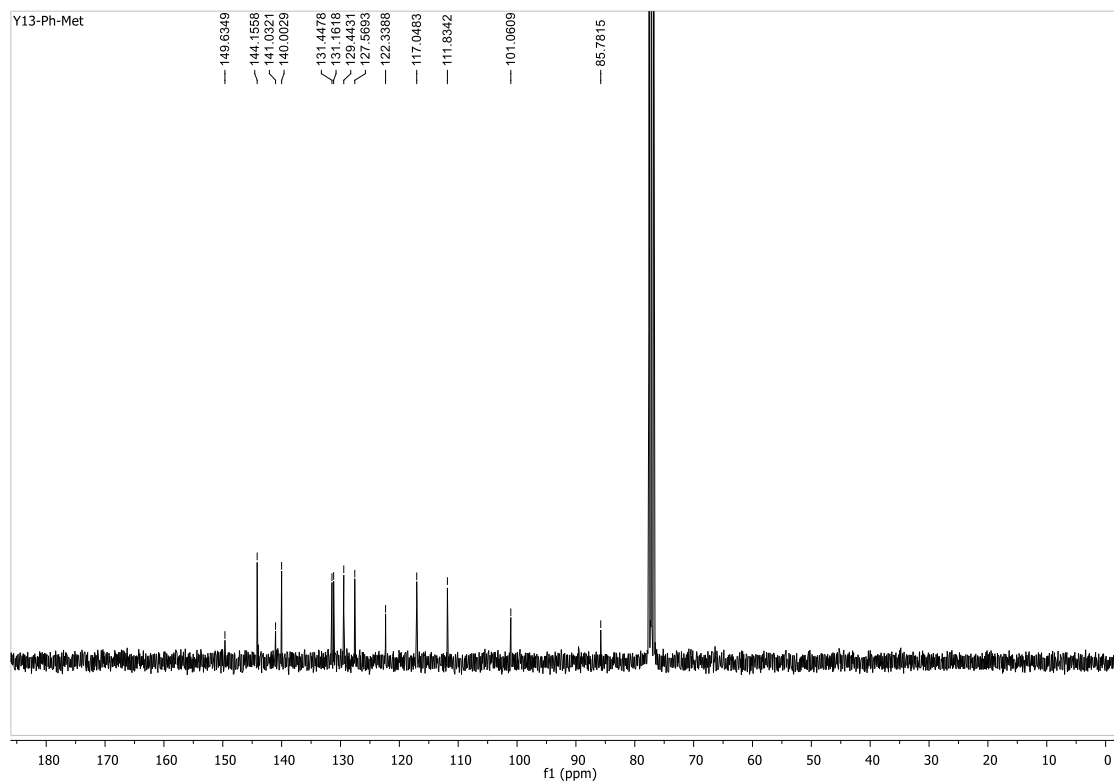

## 2-Iodo-1-(4-(trifluoromethyl)phenyl)-1*H*-pyrrolo[2,3-*b*]pyridine (3e)

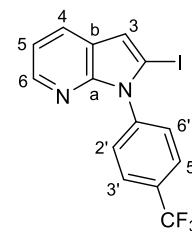

$^1\text{H}$  NMR (300 MHz,  $\text{CDCl}_3$ )

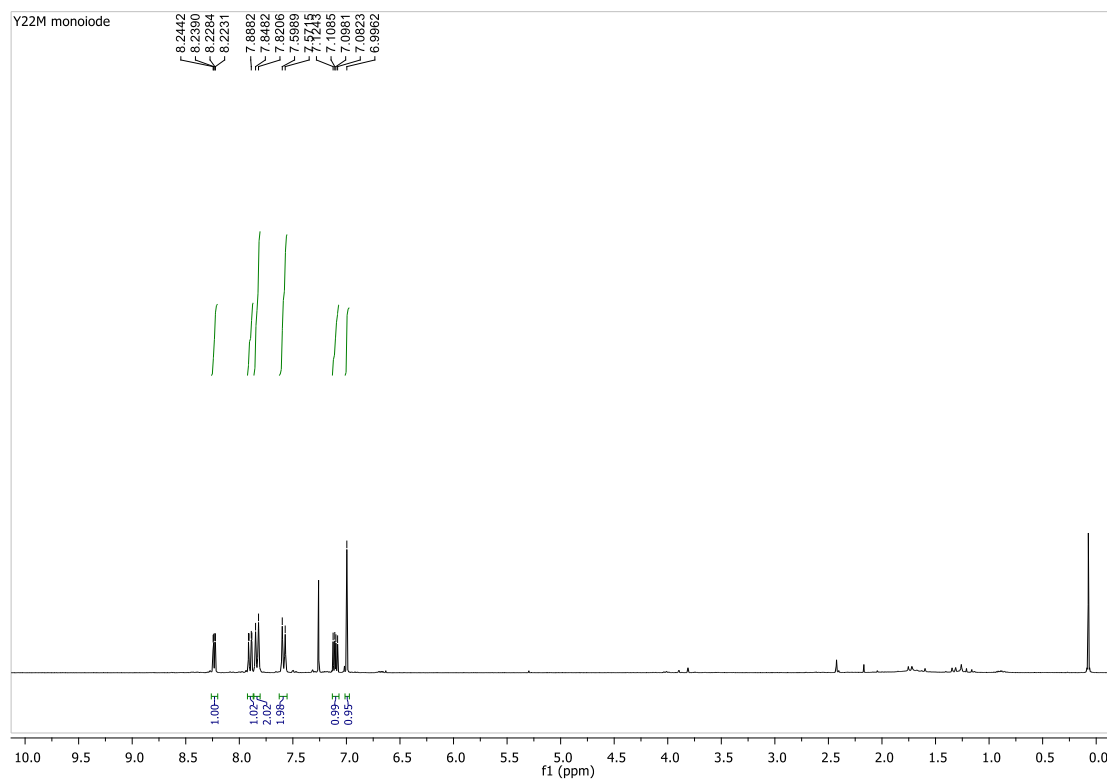

$^{13}\text{C}$  NMR (75 MHz,  $\text{CDCl}_3$ )

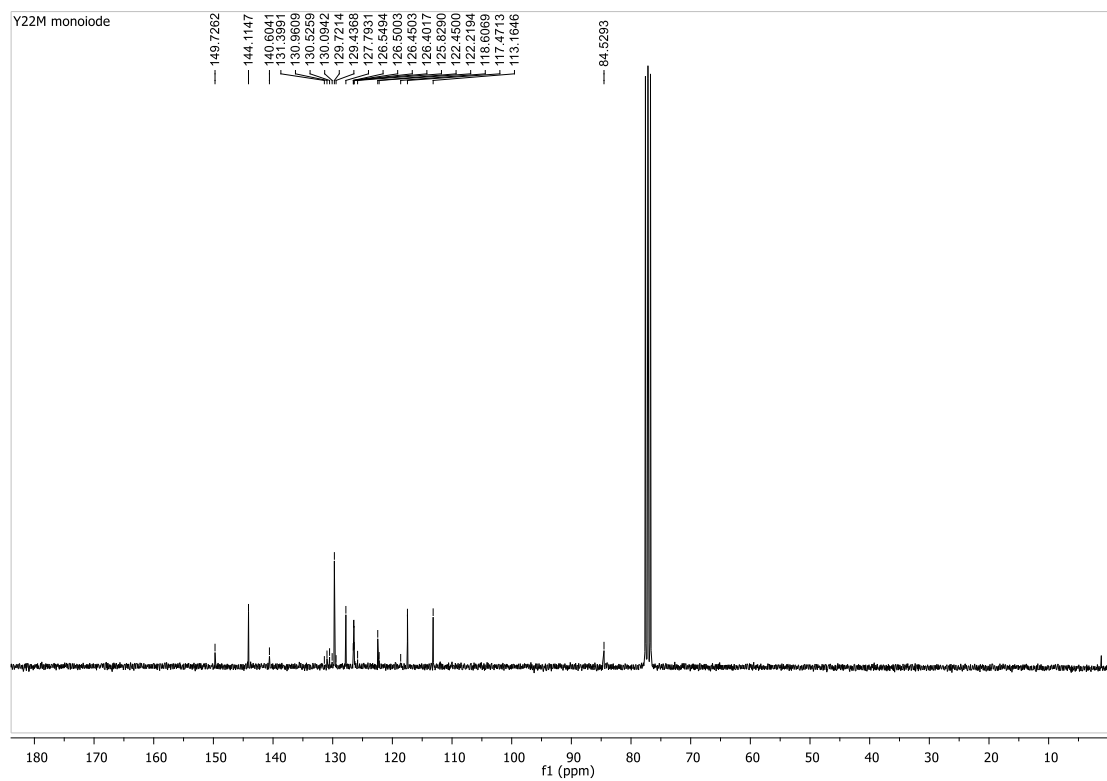

# 1-(3,5-Dimethylphenyl)-2-iodo-1*H*-pyrrolo[2,3-*b*]pyridine (3f)

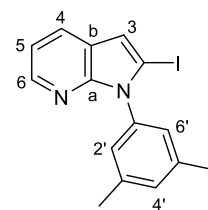

$^1\text{H}$  NMR (300 MHz,  $\text{CDCl}_3$ )

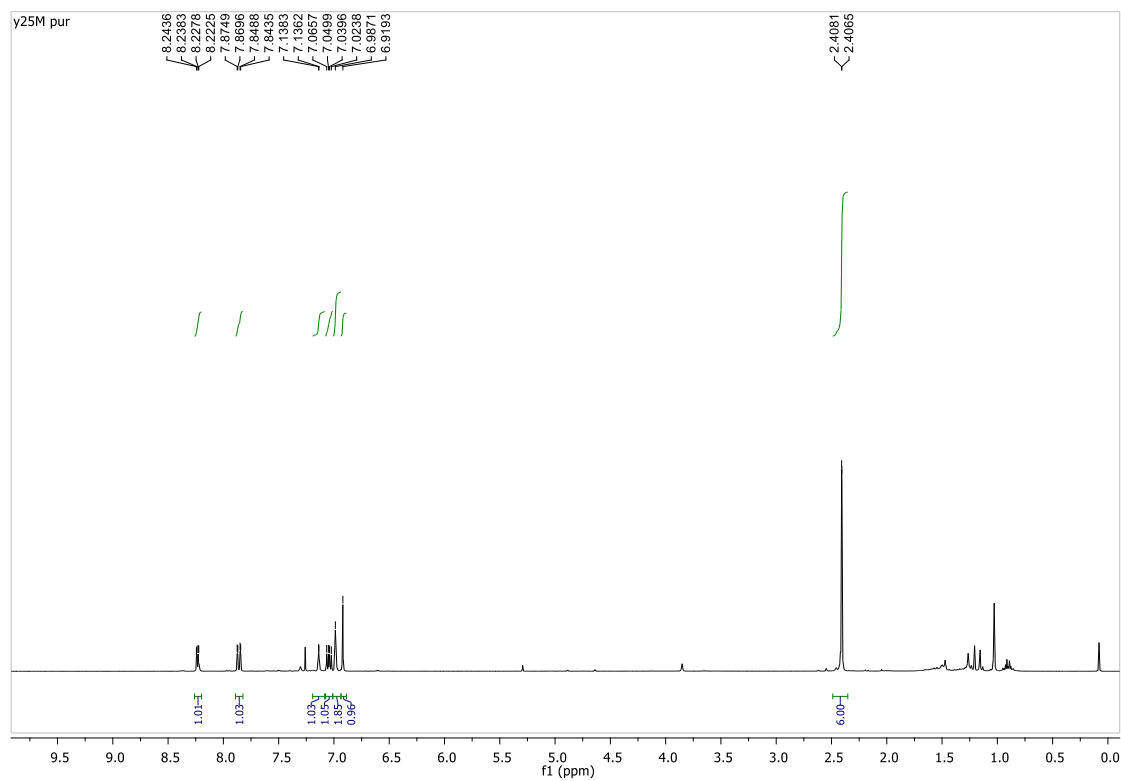

$^{13}\text{C}$  NMR (75 MHz,  $\text{CDCl}_3$ )

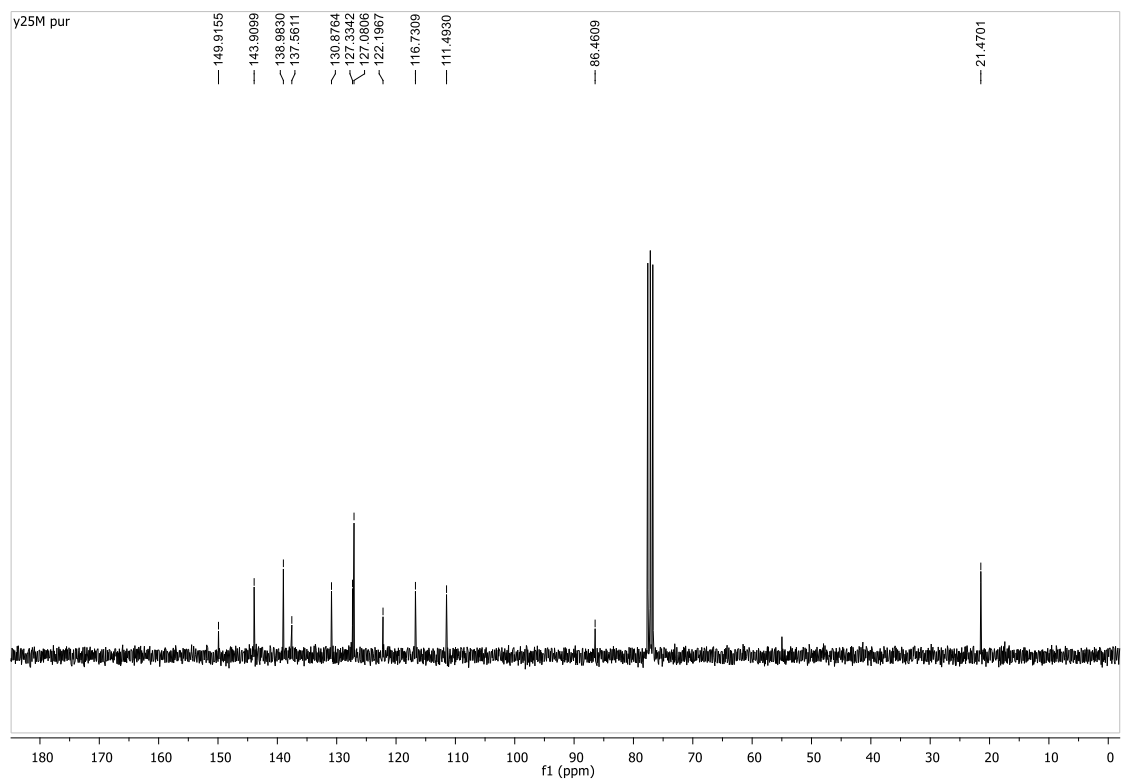

# 1-(5-Iodo-2-thienyl)-1*H*-pyrrolo[2,3-*b*]pyridine (3g)

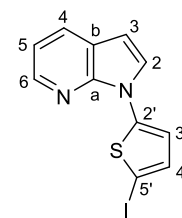

$^1\text{H}$  NMR (300 MHz,  $\text{CDCl}_3$ )

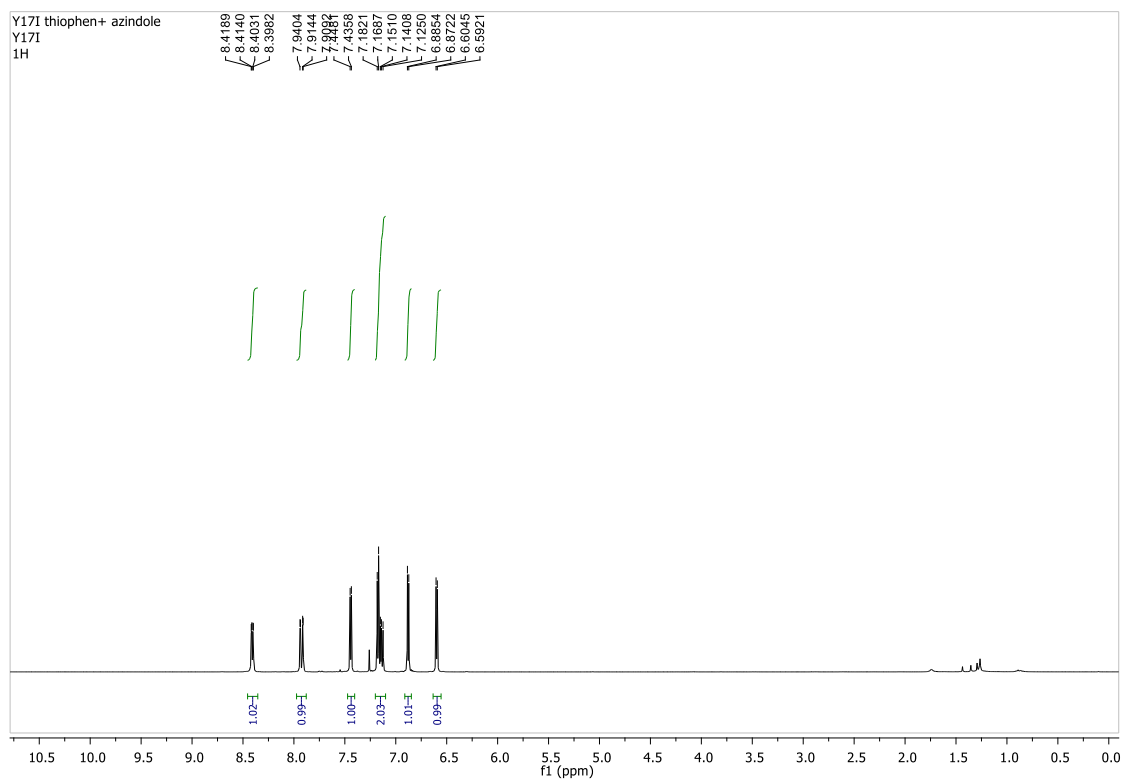

$^{13}\text{C}$  NMR (75 MHz,  $\text{CDCl}_3$ )

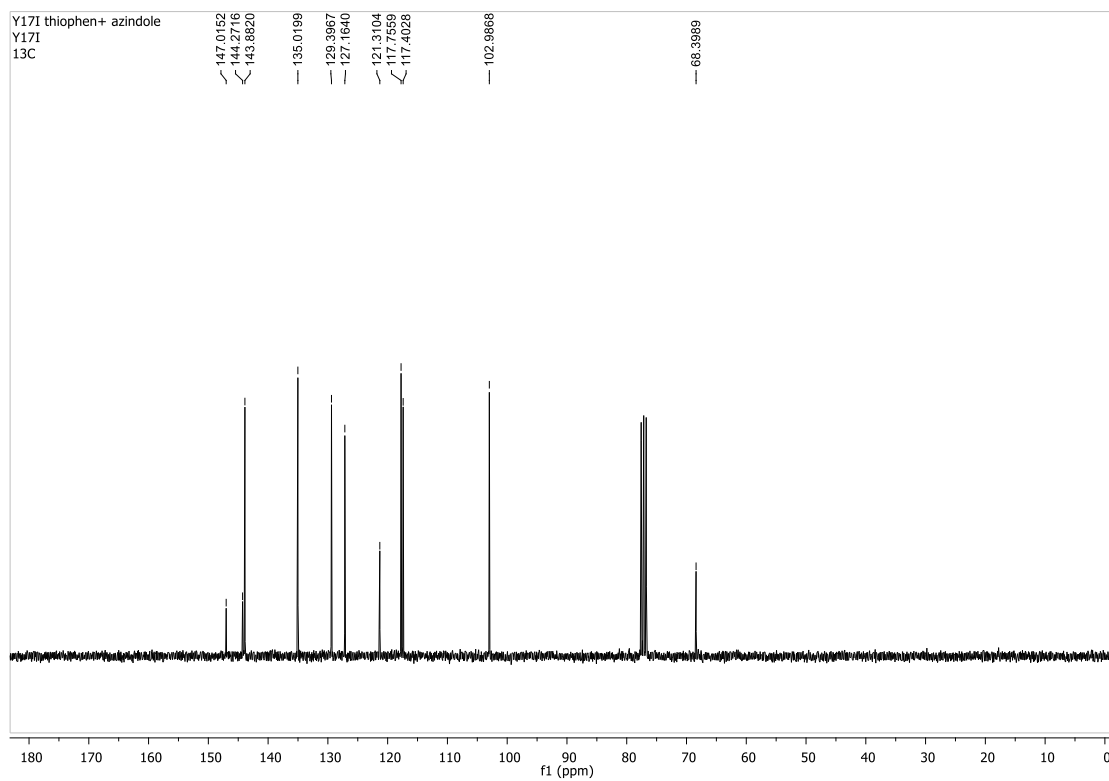



## 2-Iodo-1-(5-iodo-2-thienyl)-1*H*-pyrrolo[2,3-*b*]pyridine (3g')

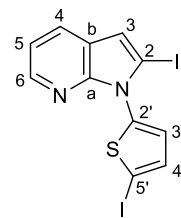

$^1\text{H}$  NMR (300 MHz,  $\text{CDCl}_3$ )

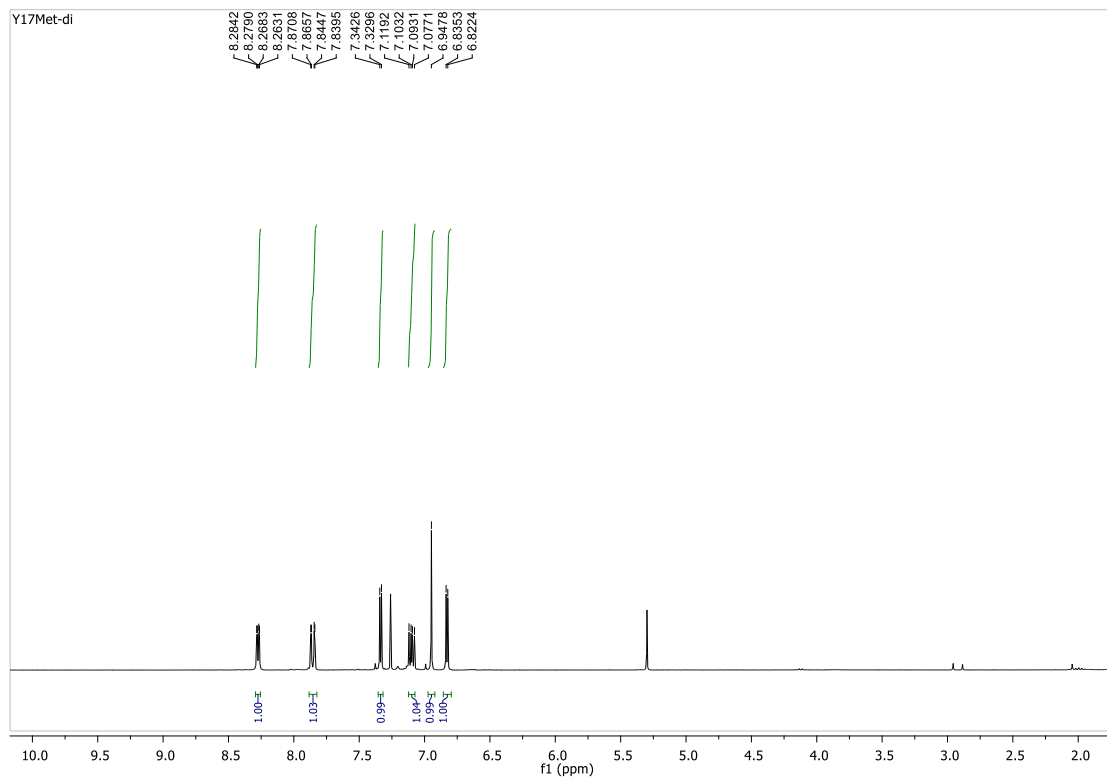

$^{13}\text{C}$  NMR (75 MHz,  $\text{CDCl}_3$ )

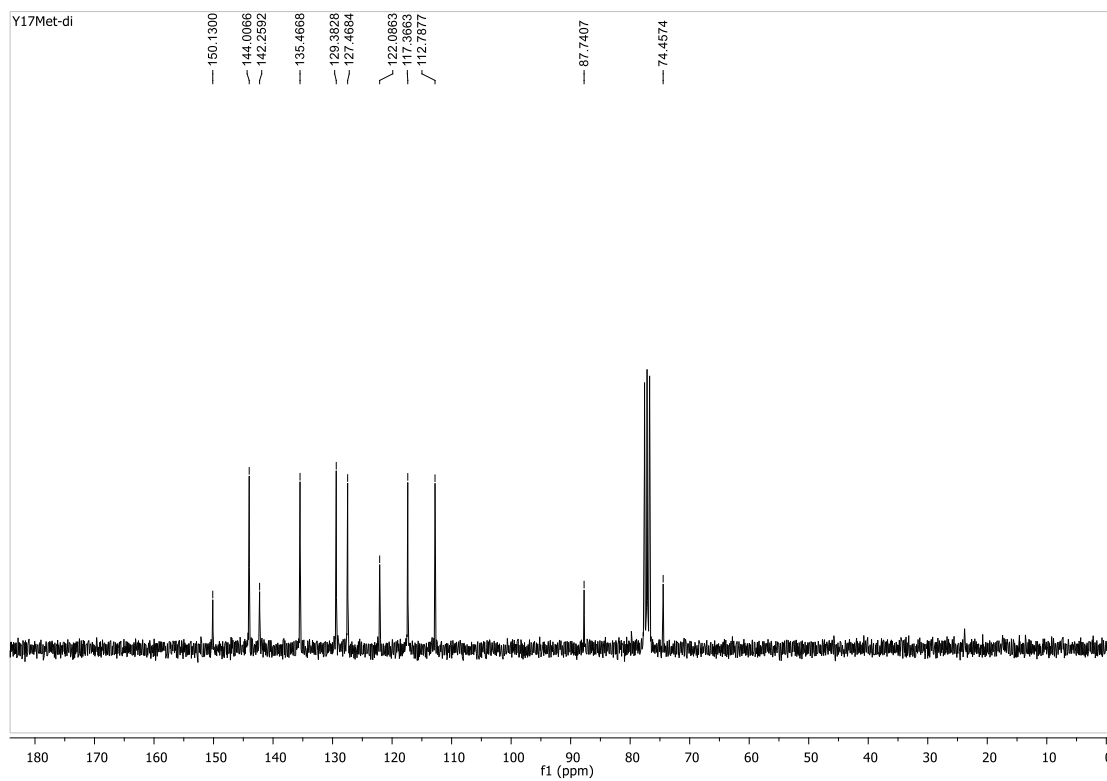

## 2-Iodo-1-(3-(7-azaindoly)phenyl)-7-azaindole (3k)

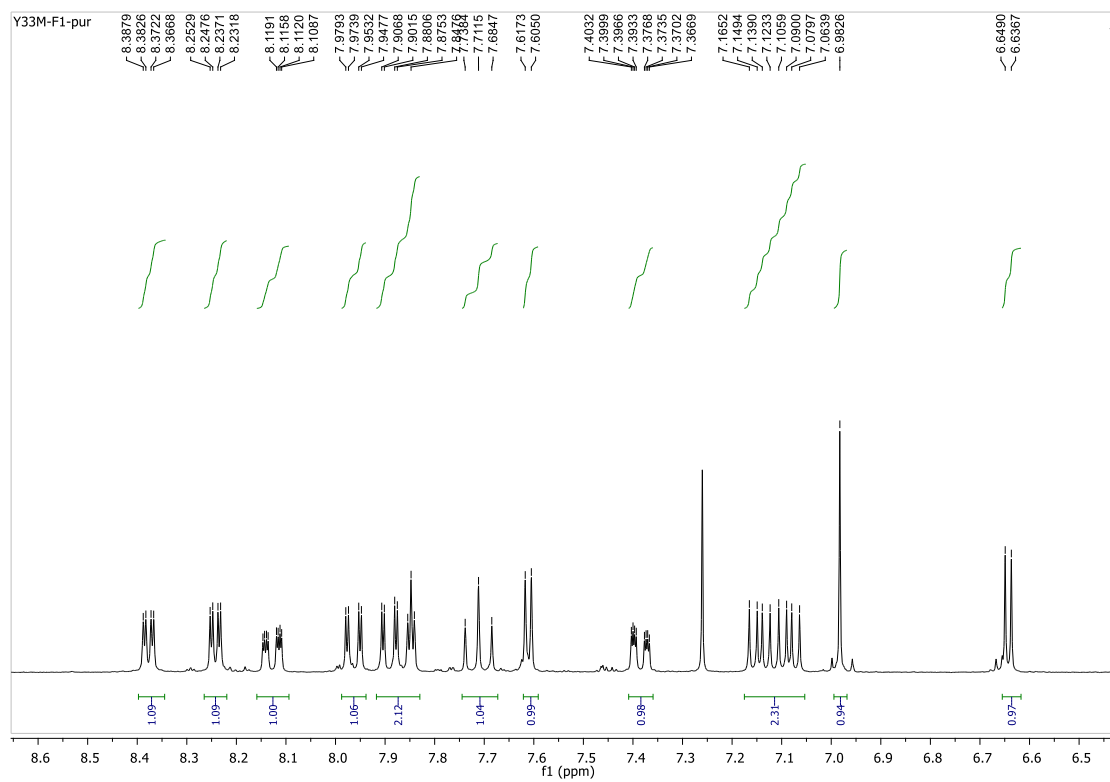

# 1,1'-(1,3-Phenylene)bis(2-iodo-1*H*-pyrrolo[2,3-*b*]pyridine) (3k')

<sup>1</sup>H NMR (300 MHz, CDCl<sub>3</sub>)

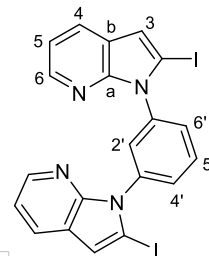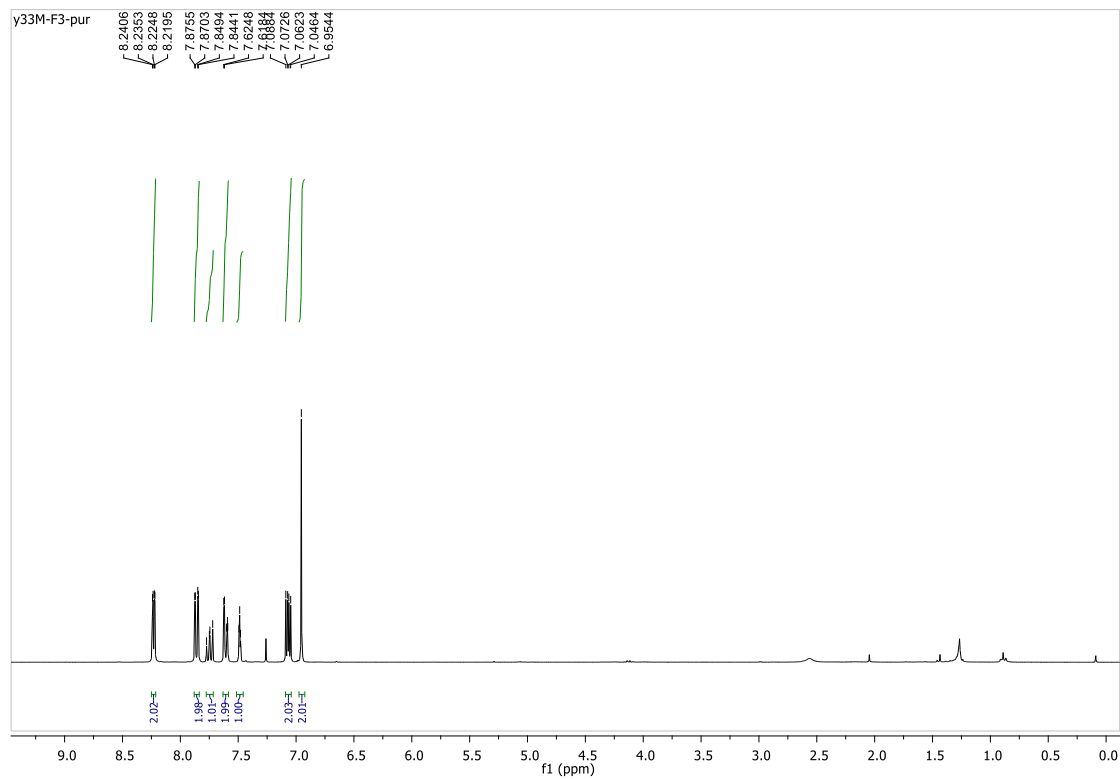

<sup>13</sup>C NMR (75 MHz, CDCl<sub>3</sub>)

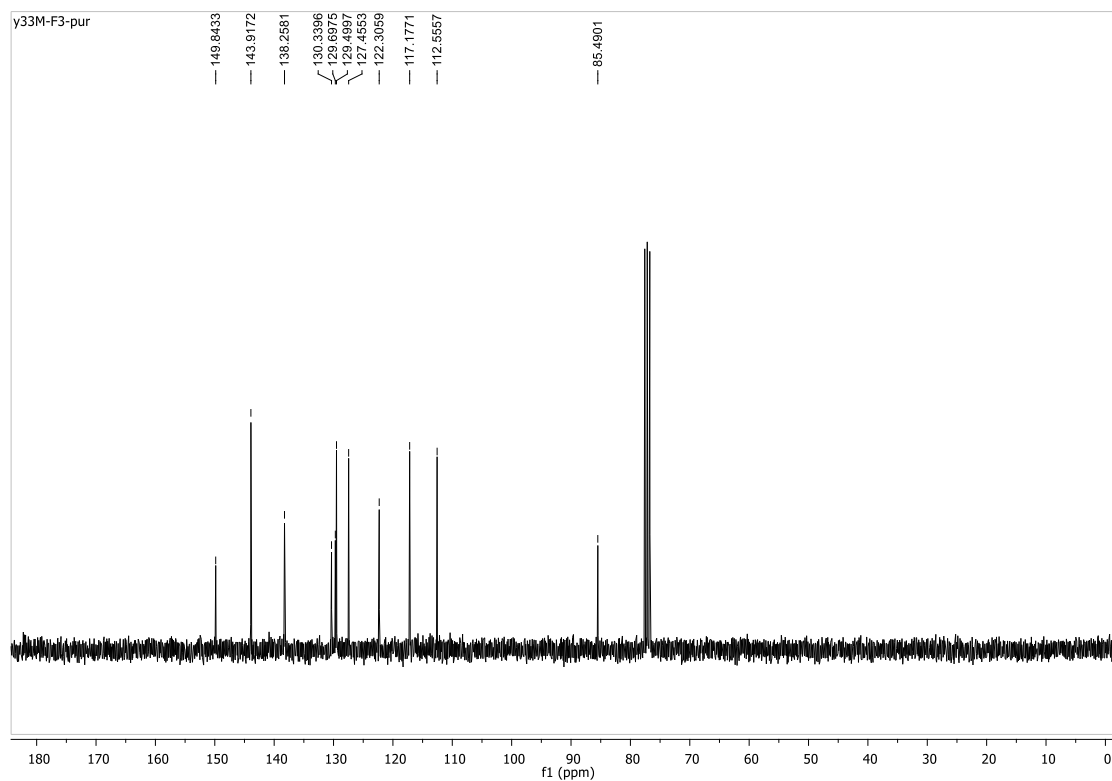

# 1,1'-(1-Iodo-2,4-phenylene)bis(2-iodo-1*H*-pyrrolo[2,3-*b*]pyridine (3k'')

<sup>1</sup>H NMR (300 MHz, (CD<sub>3</sub>)<sub>2</sub>SO)

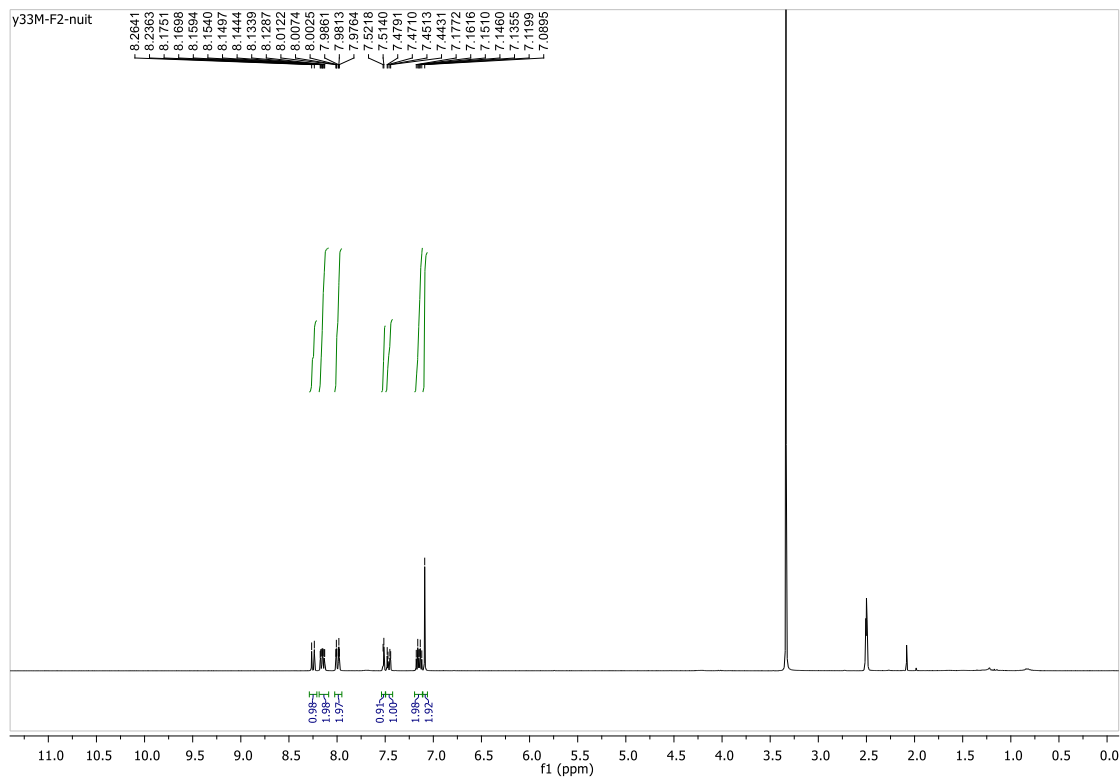

<sup>13</sup>C NMR (75 MHz, (CD<sub>3</sub>)<sub>2</sub>SO)

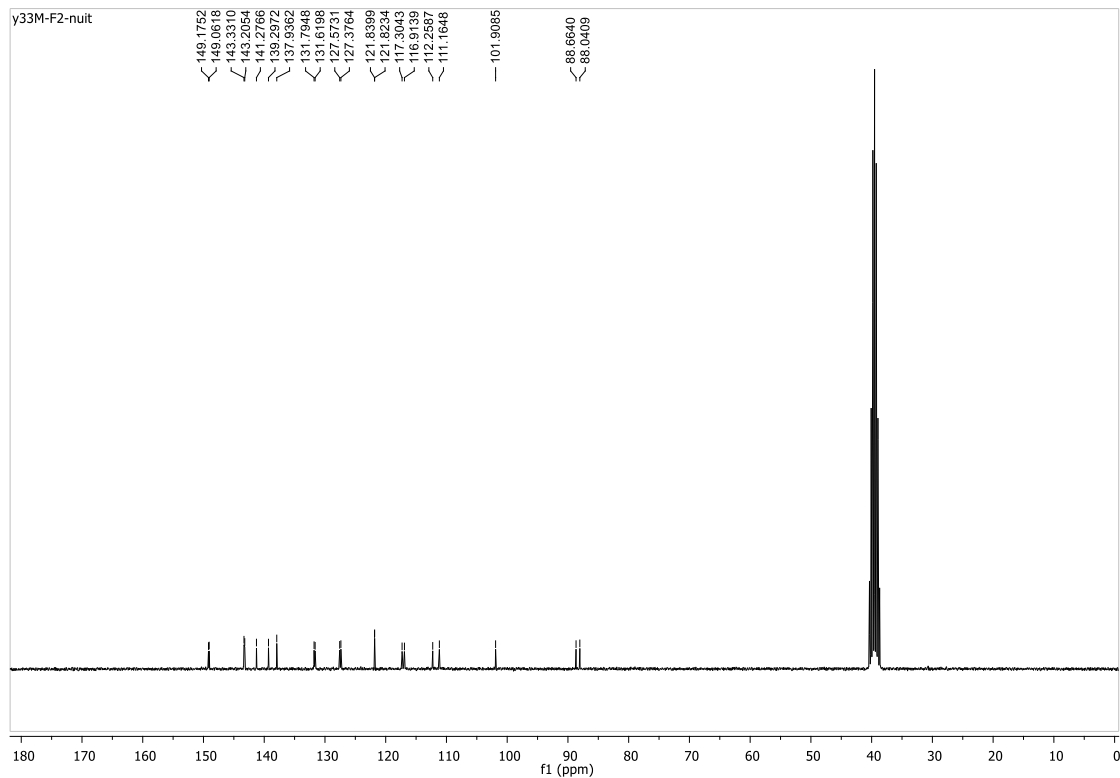

### 3-Iodo-1-(4-methoxyphenyl)-1*H*-pyrrolo[2,3-*b*]pyridine (4b)

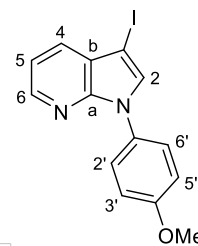

$^1\text{H}$  NMR (300 MHz,  $\text{CDCl}_3$ )

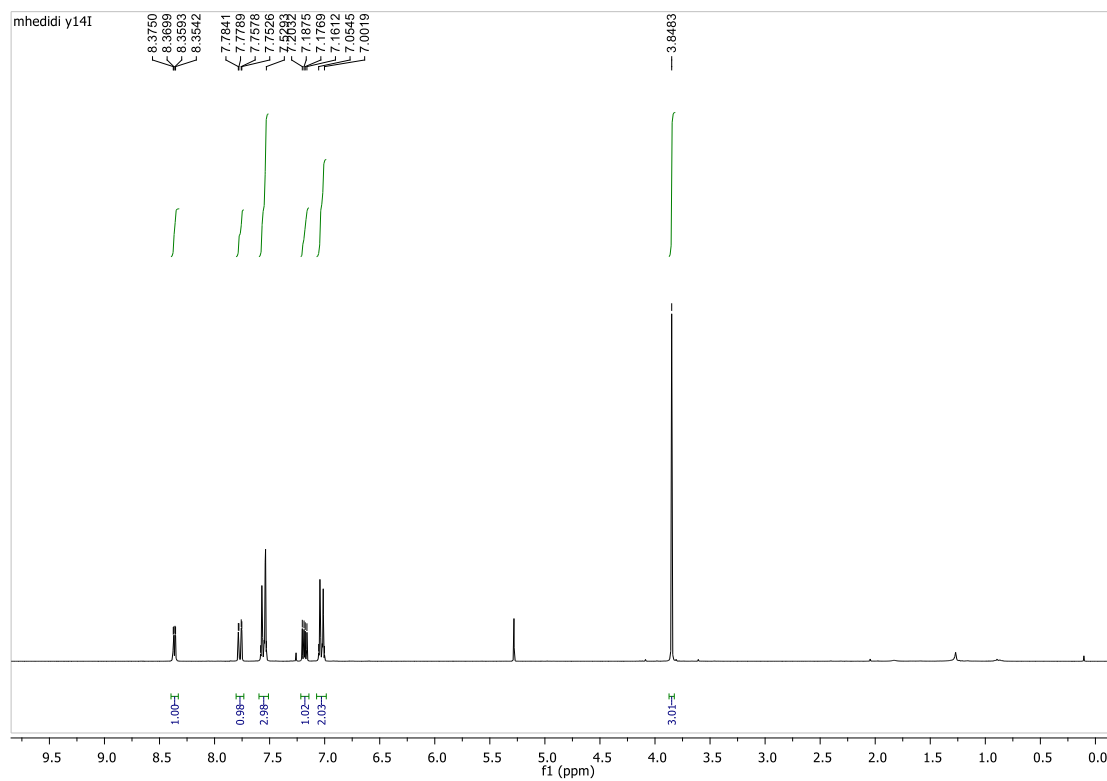

$^{13}\text{C}$  NMR (75 MHz,  $\text{CDCl}_3$ )

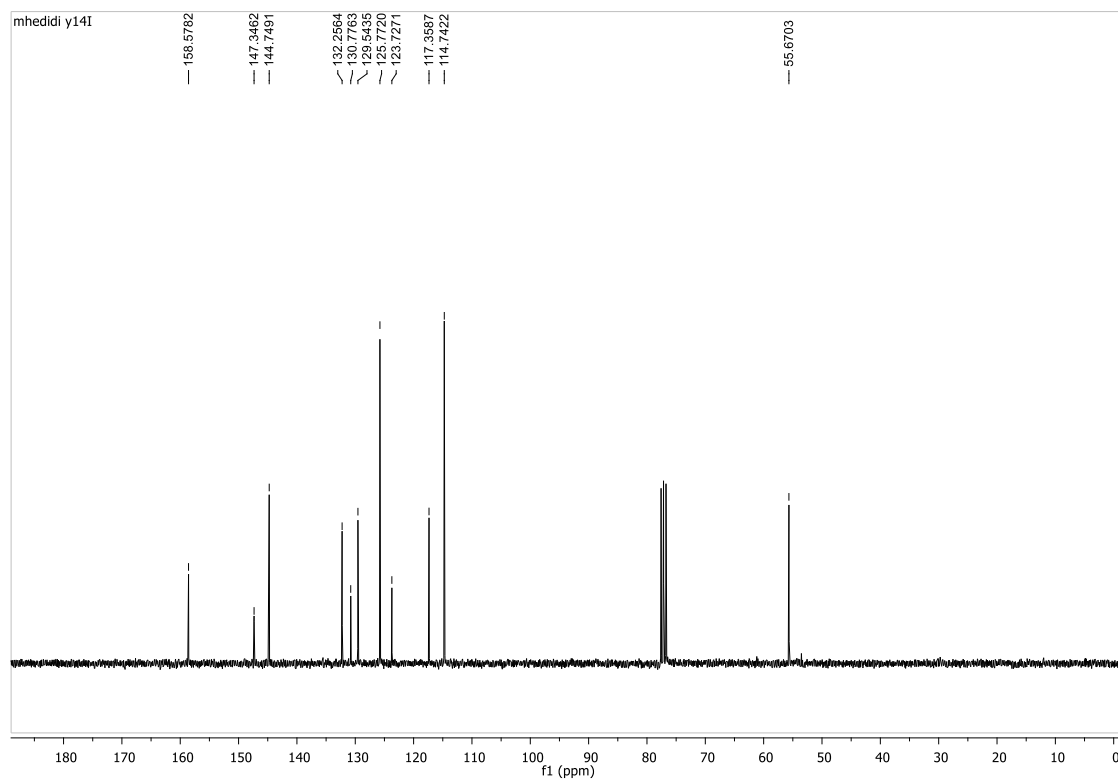

# 1-(4-Chlorophenyl)-3-iodo-1*H*-pyrrolo[2,3-*b*]pyridine (4c)

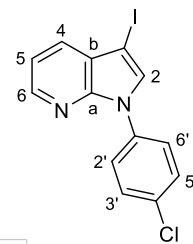

$^1\text{H}$  NMR (300 MHz,  $\text{CDCl}_3$ )

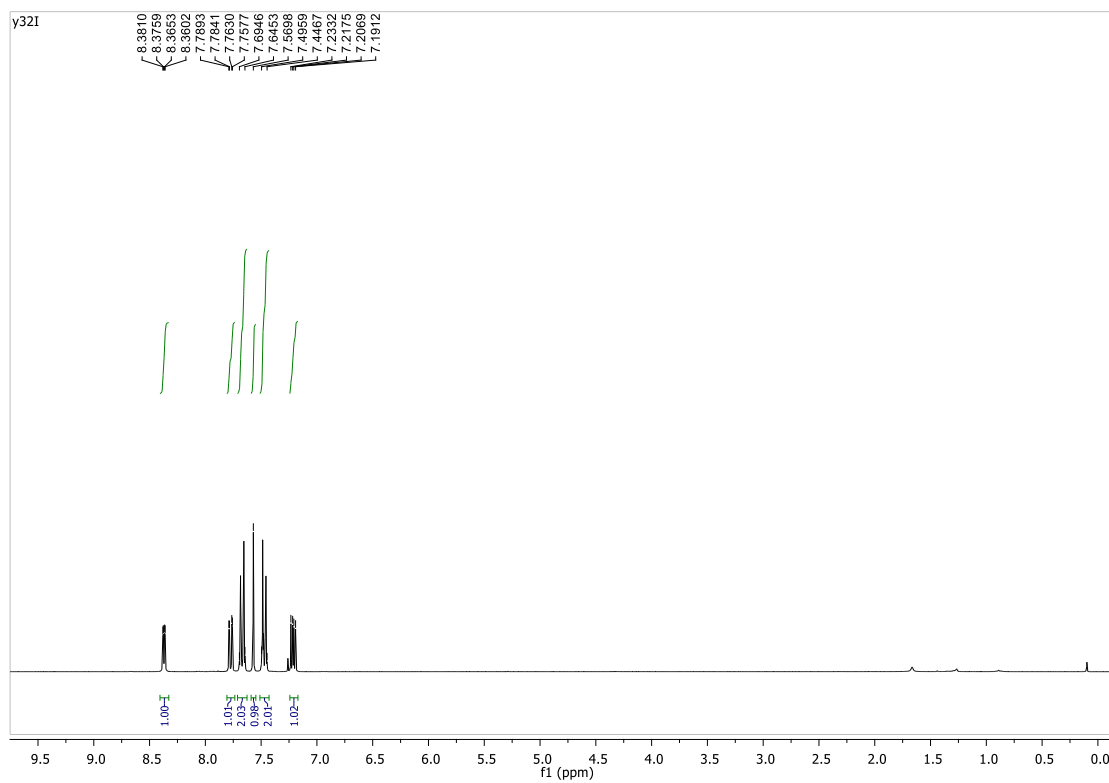

$^{13}\text{C}$  NMR (75 MHz,  $\text{CDCl}_3$ )

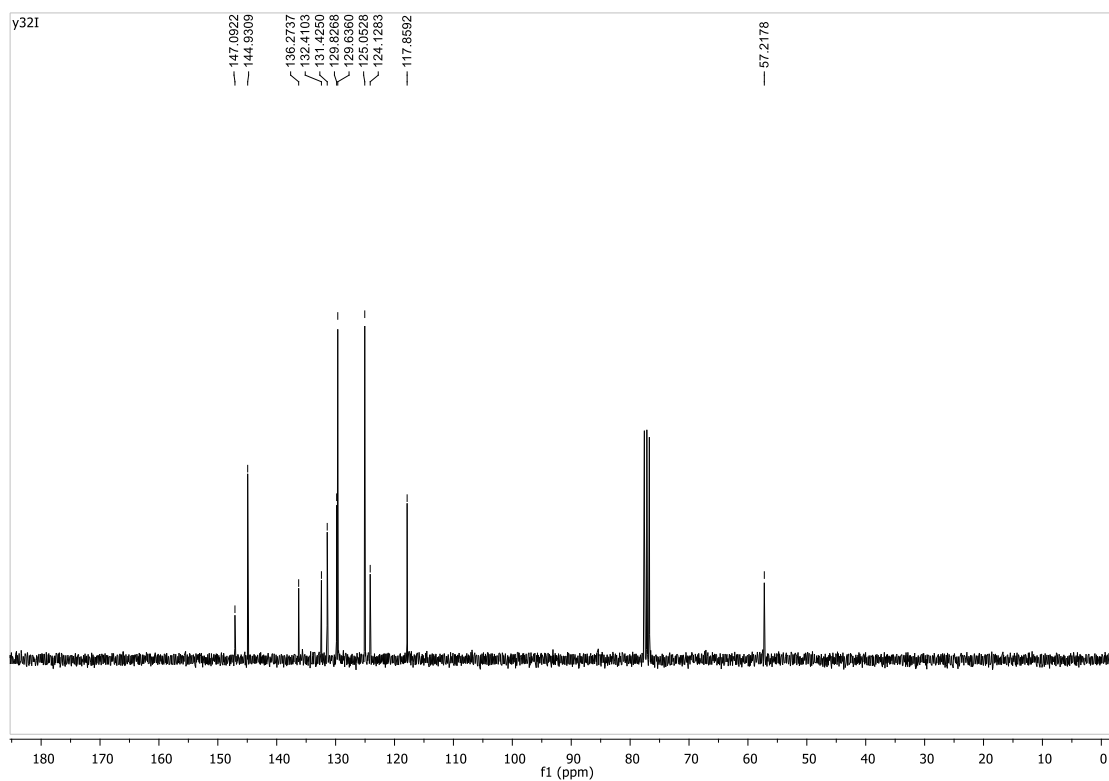

# 1-(4-Fluorophenyl)-3-iodo-1*H*-pyrrolo[2,3-*b*]pyridine (4d)

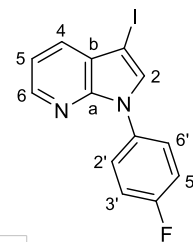

$^1\text{H}$  NMR (300 MHz,  $\text{CDCl}_3$ )

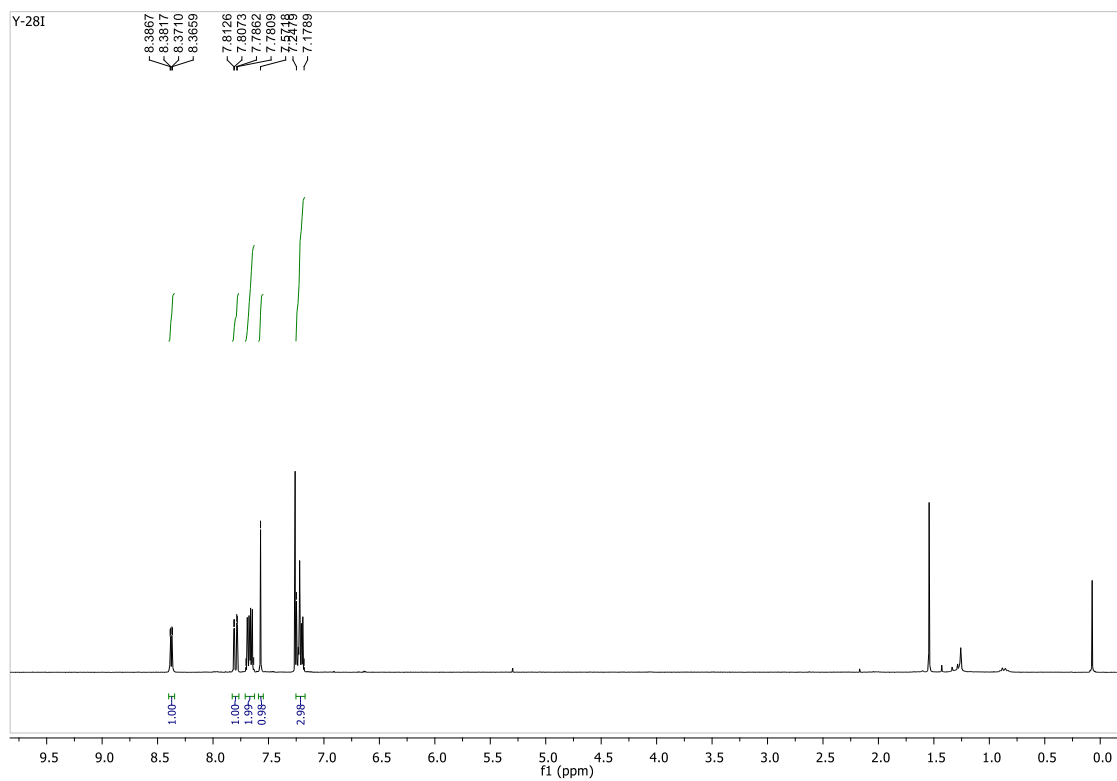

$^{13}\text{C}$  NMR (75 MHz,  $\text{CDCl}_3$ )

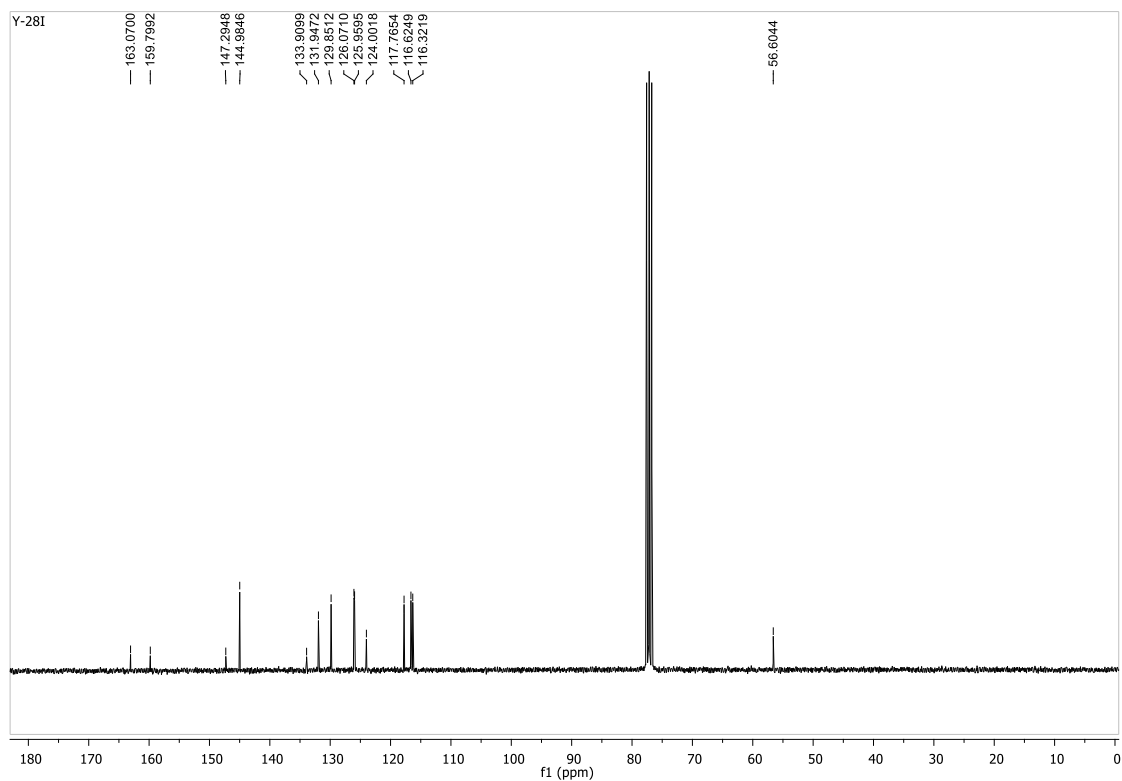

### 3-Iodo-1-(4-(trifluoromethyl)phenyl)-1*H*-pyrrolo[2,3-*b*]pyridine (4e)

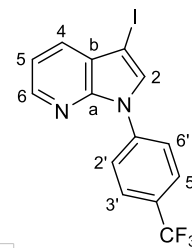

$^1\text{H}$  NMR (300 MHz,  $\text{CDCl}_3$ )

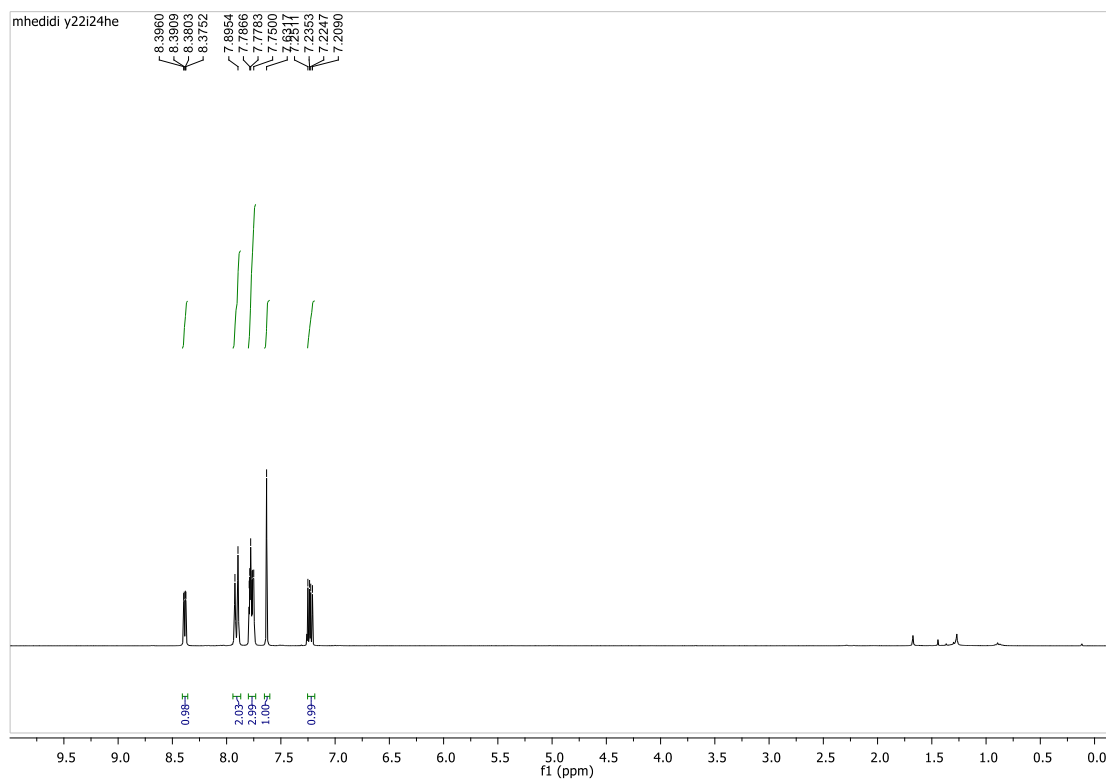

$^{13}\text{C}$  NMR (75 MHz,  $\text{CDCl}_3$ )

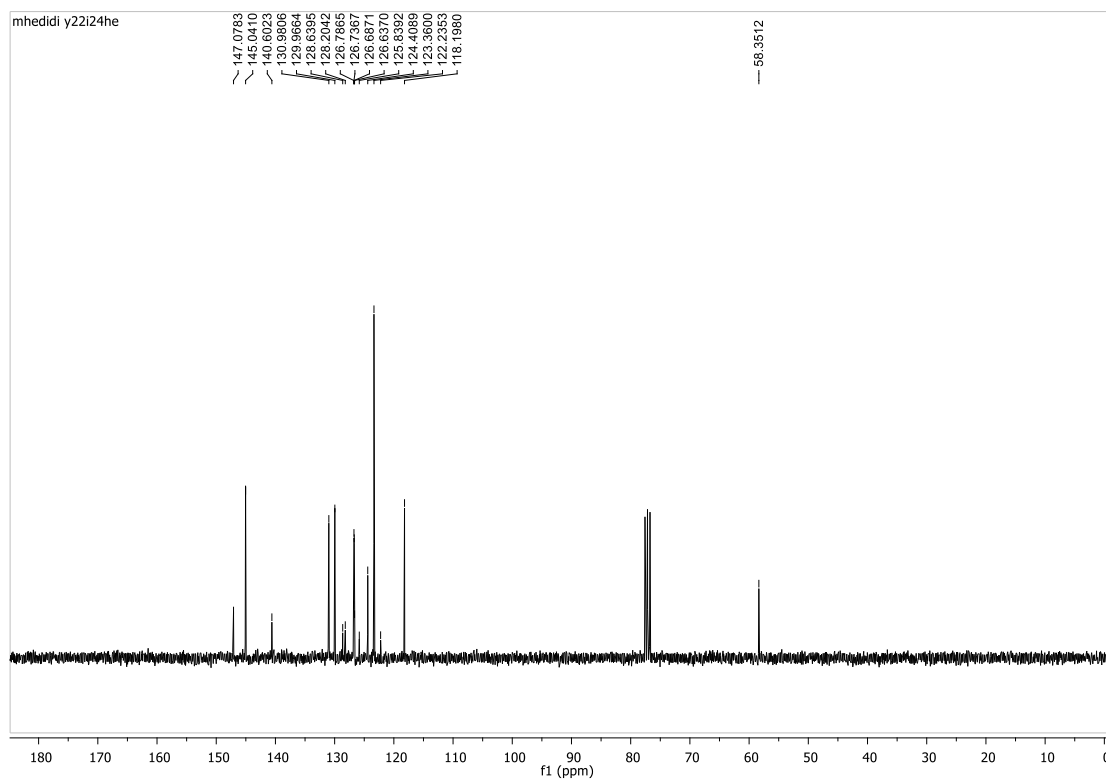



### 3-Iodo-1-(3,5-dimethylphenyl)-1H-pyrrolo[2,3-*b*]pyridine (4f)

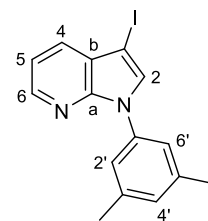

$^1\text{H}$  NMR (300 MHz,  $\text{CDCl}_3$ )

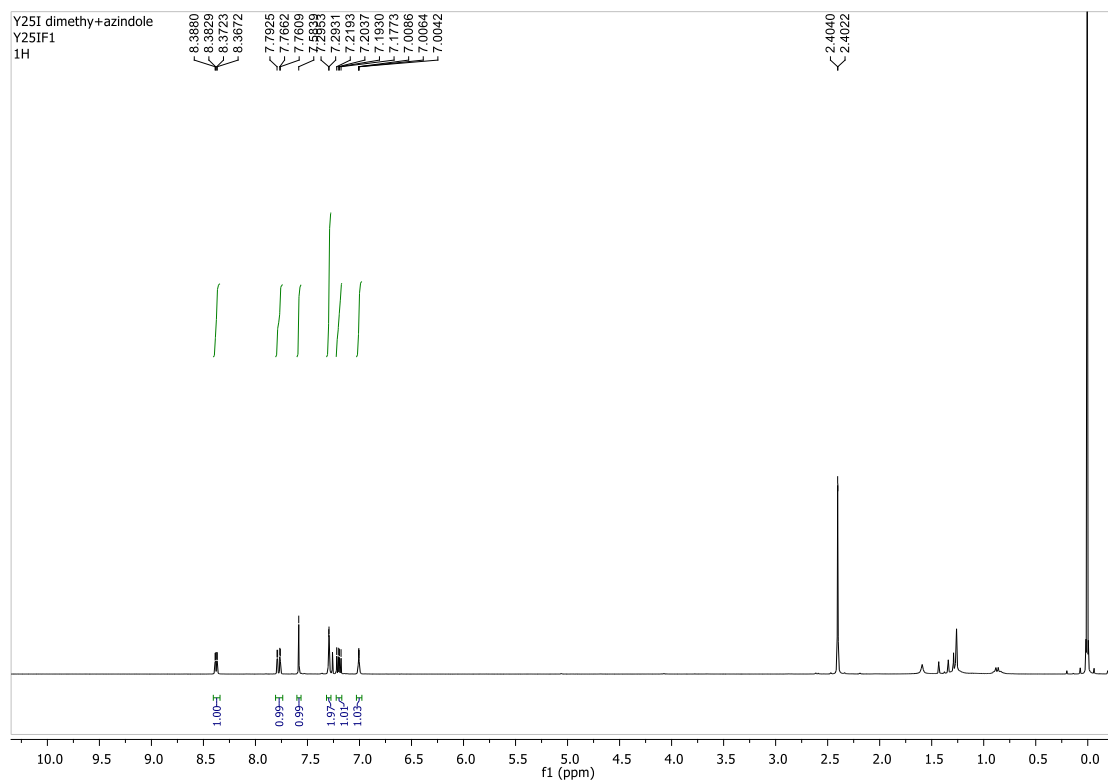

$^{13}\text{C}$  NMR (75 MHz,  $\text{CDCl}_3$ )

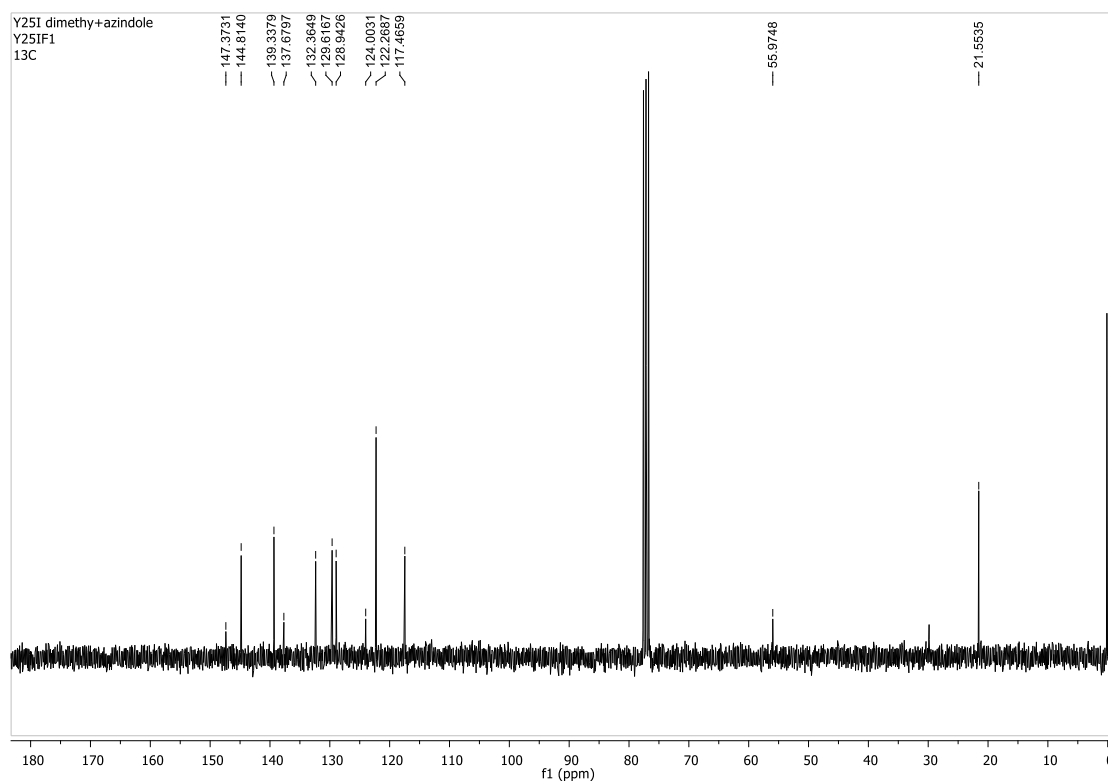

### 3-Iodo-1-(3-pyridyl)-1*H*-pyrrolo[2,3-*b*]pyridine (4h)

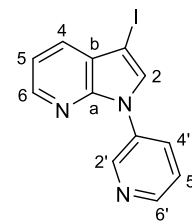

$^1\text{H}$  NMR (300 MHz,  $\text{CDCl}_3$ )

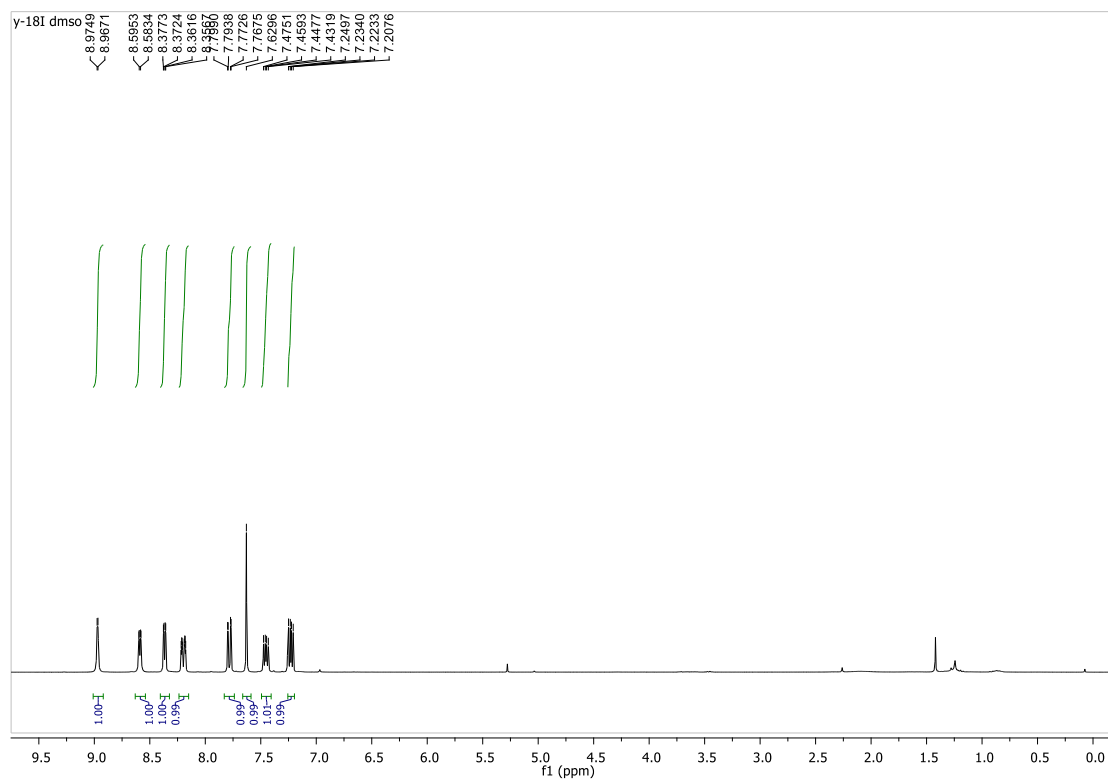

$^{13}\text{C}$  NMR (75 MHz,  $\text{CDCl}_3$ )

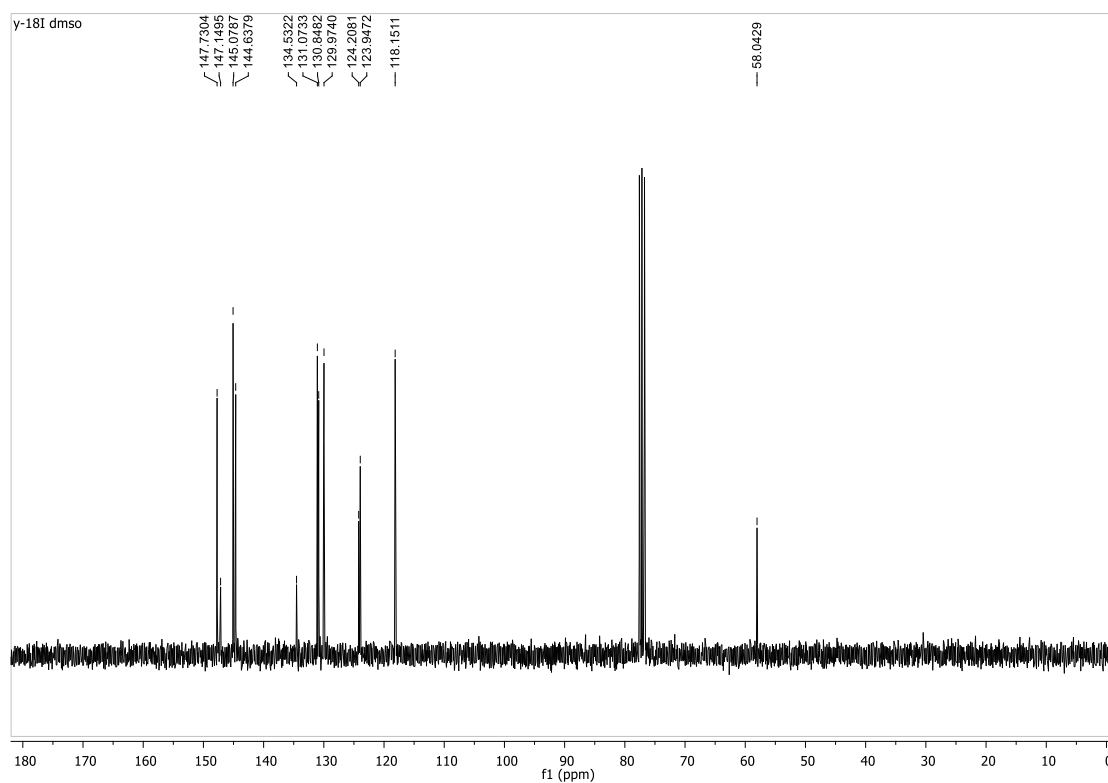

### 3-Iodo-1-(2-pyridyl)-1*H*-pyrrolo[2,3-*b*]pyridine (4i)

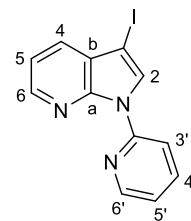

$^1\text{H}$  NMR (300 MHz,  $\text{CDCl}_3$ )

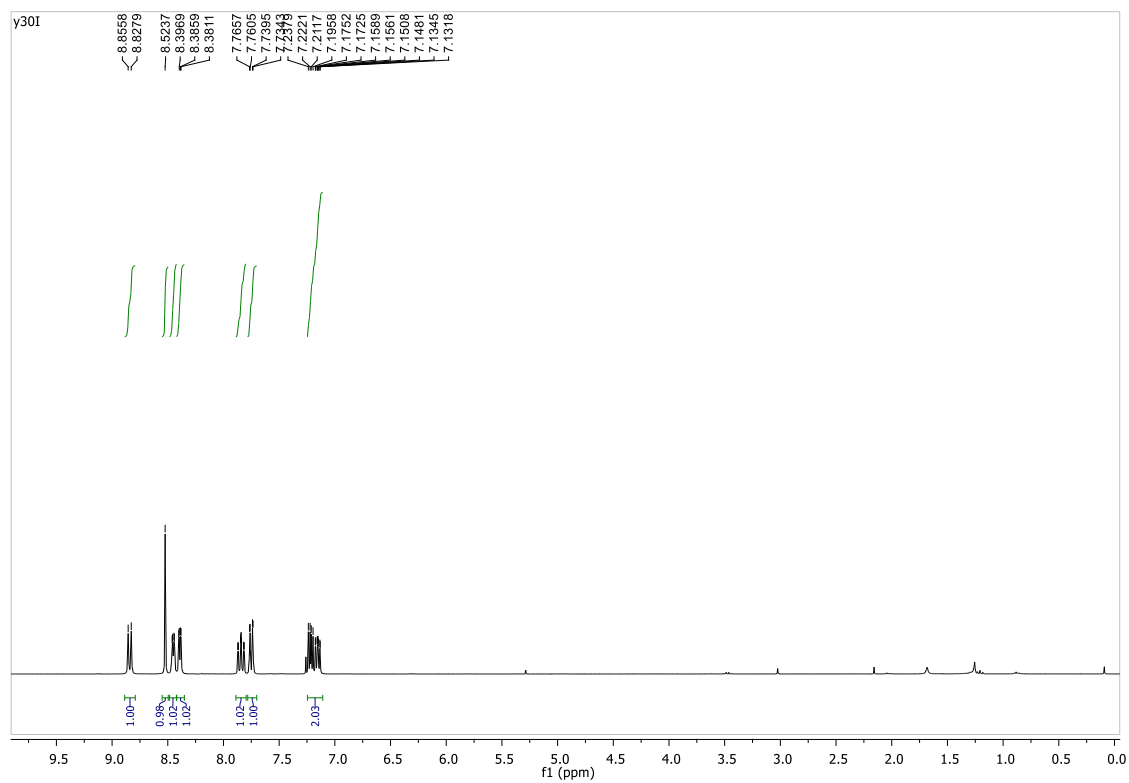

$^{13}\text{C}$  NMR (75 MHz,  $\text{CDCl}_3$ )

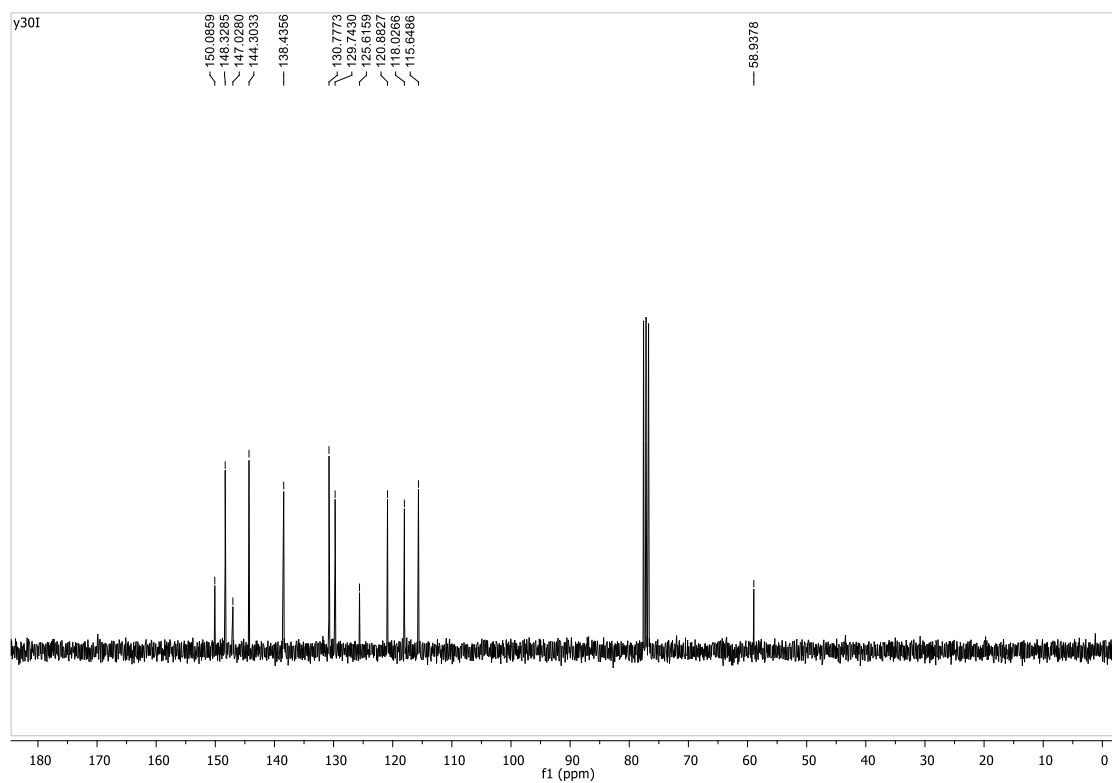

### 3-(1-Indolyl)-1-(4-(trifluoromethyl)phenyl)-1*H*-pyrrolo[2,3-*b*]pyridine (5e)

<sup>1</sup>H NMR (300 MHz, CDCl<sub>3</sub>)

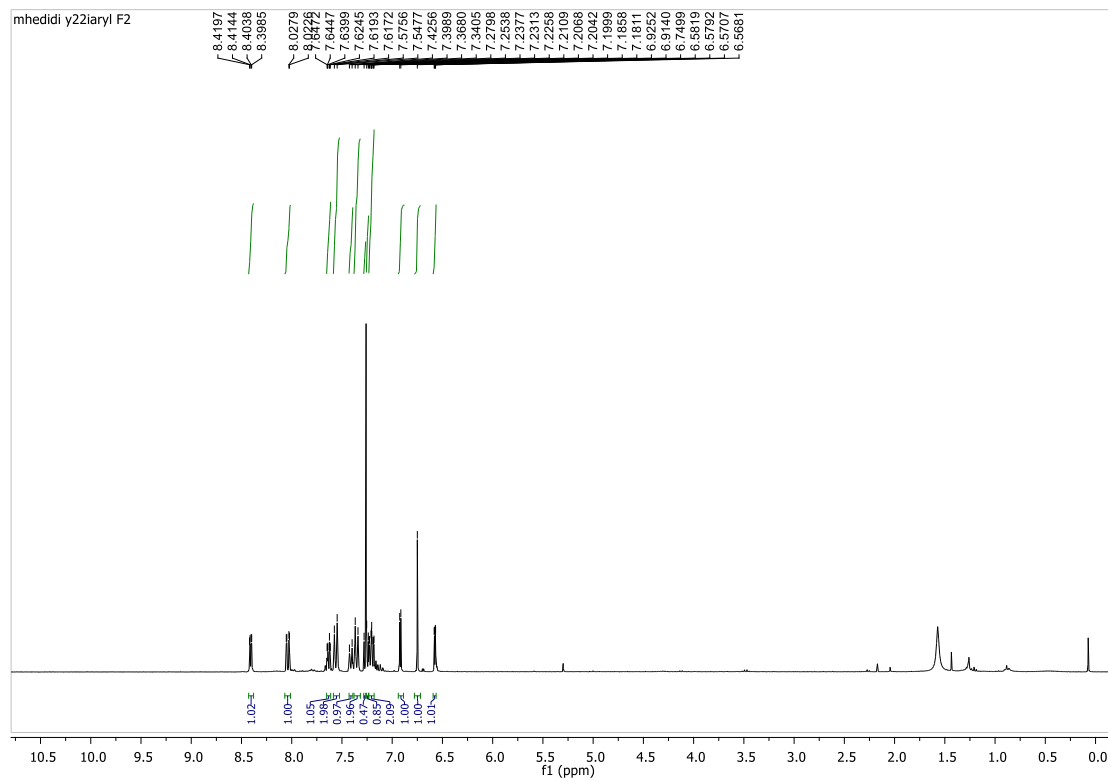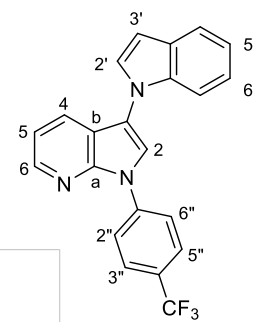

<sup>13</sup>C NMR (75 MHz, CDCl<sub>3</sub>)

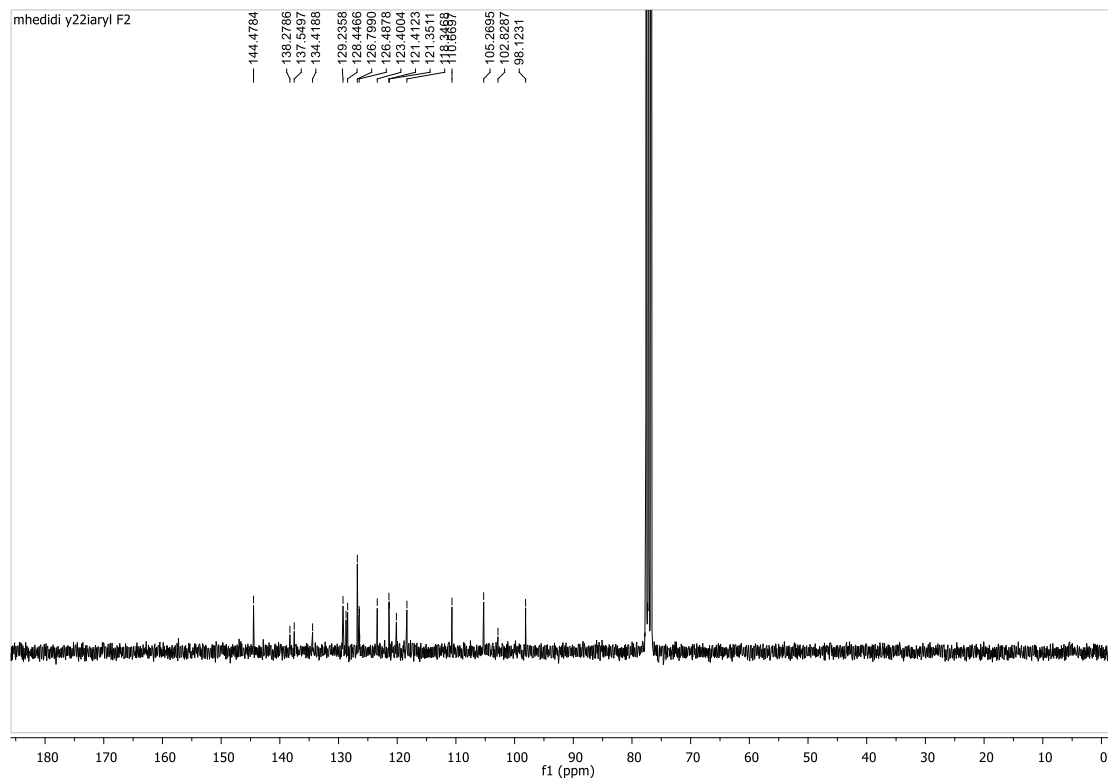

### 3-(1-Indolyl)-1-(2-pyridyl)-1*H*-pyrrolo[2,3-*b*]pyridine (5i)

<sup>1</sup>H NMR (300 MHz, CDCl<sub>3</sub>)

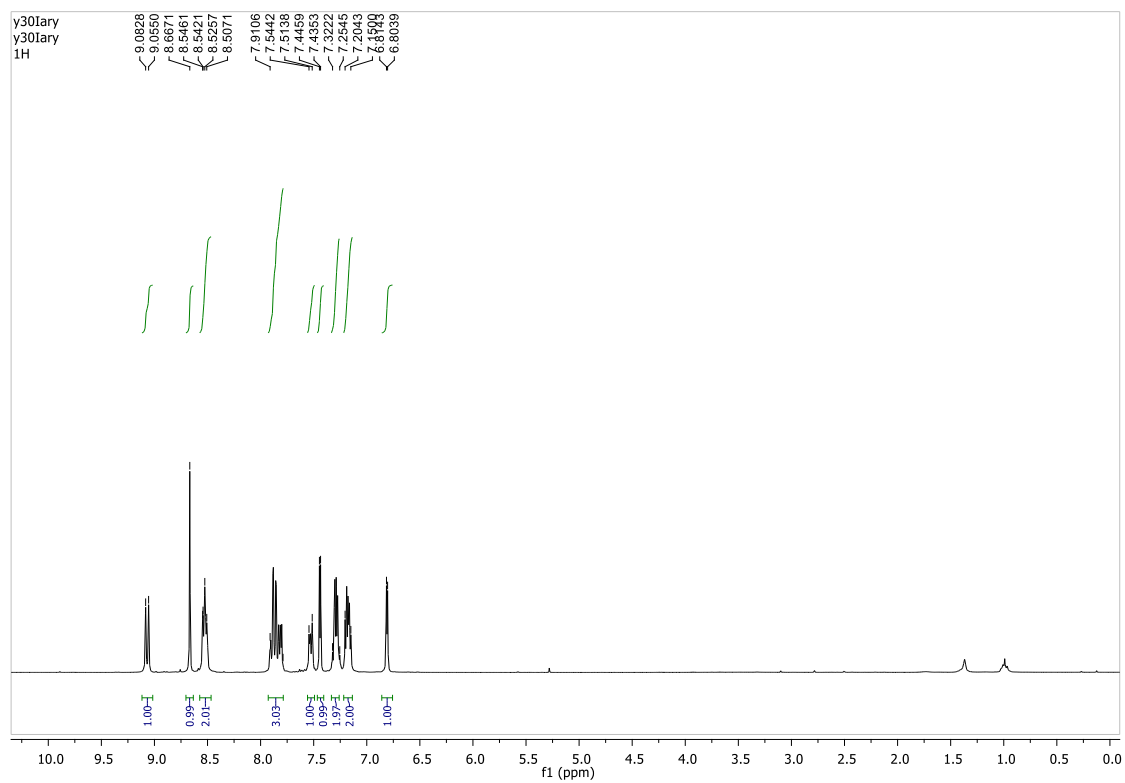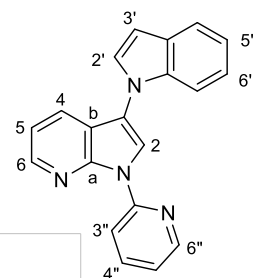

<sup>13</sup>C NMR (75 MHz, CDCl<sub>3</sub>)

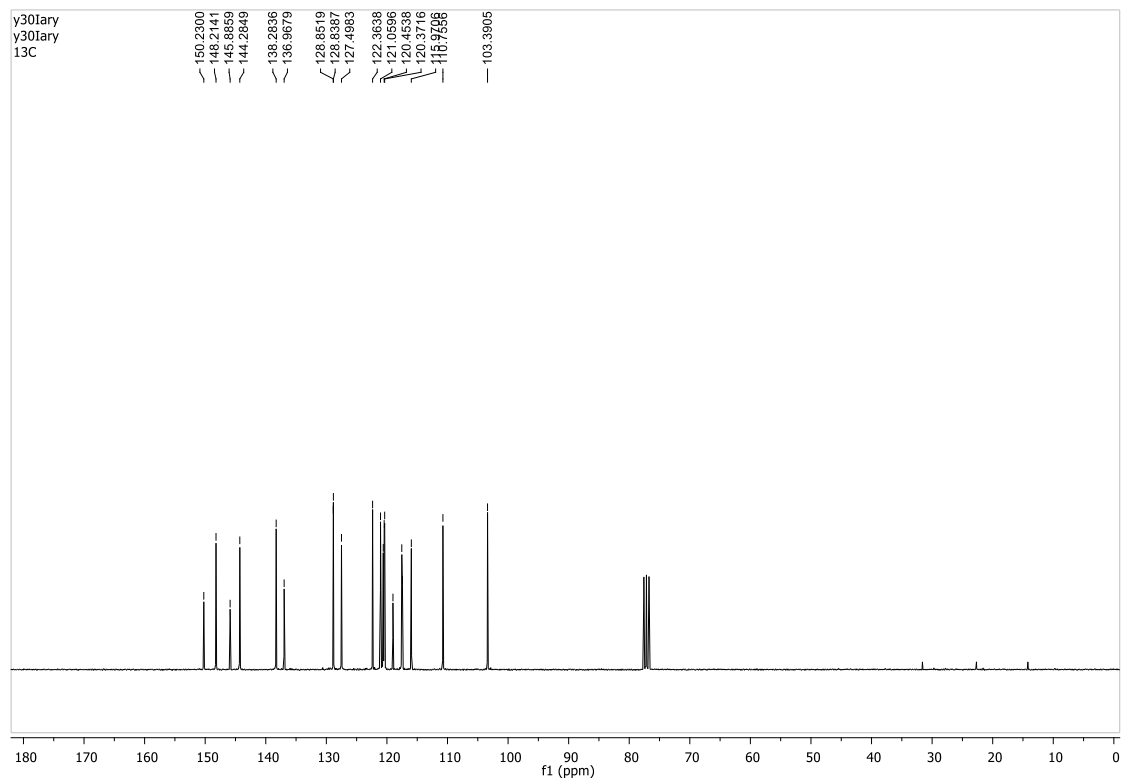

## 2-(1-Indolyl)-1-(5-(1-indolyl)-2-thienyl)-1*H*-pyrrolo[2,3-*b*]pyridine (6g')

<sup>1</sup>H NMR (300 MHz, CDCl<sub>3</sub>)

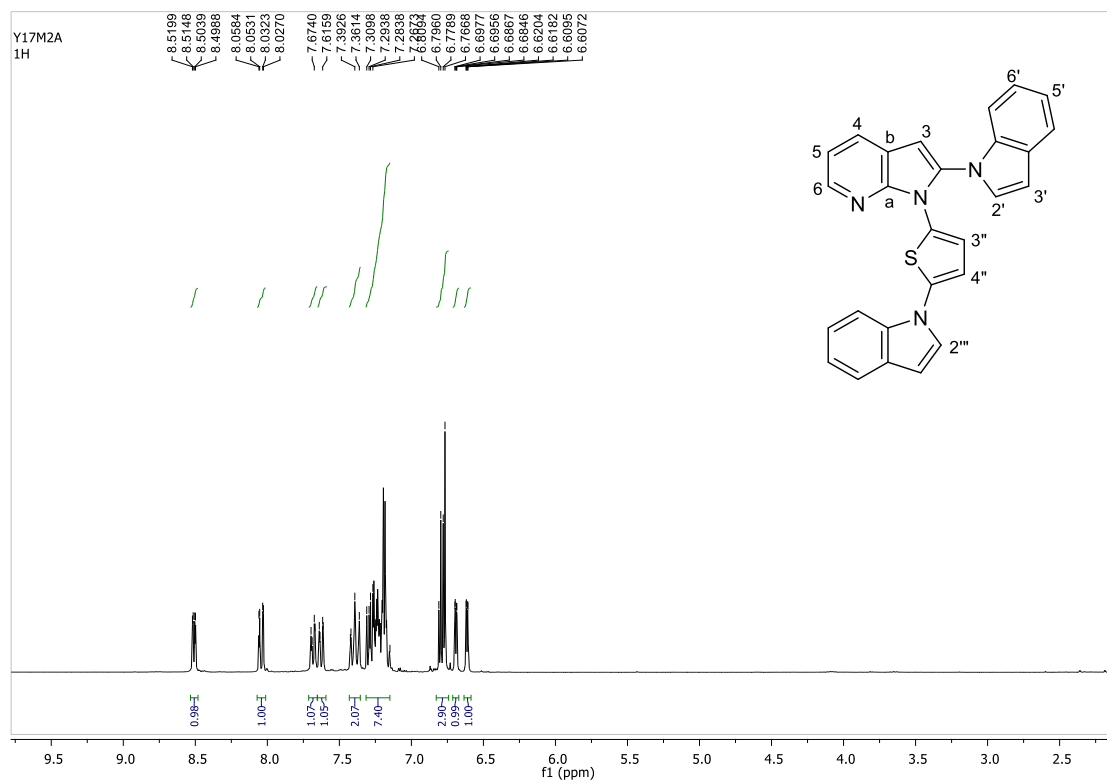

<sup>13</sup>C NMR (75 MHz, CDCl<sub>3</sub>)

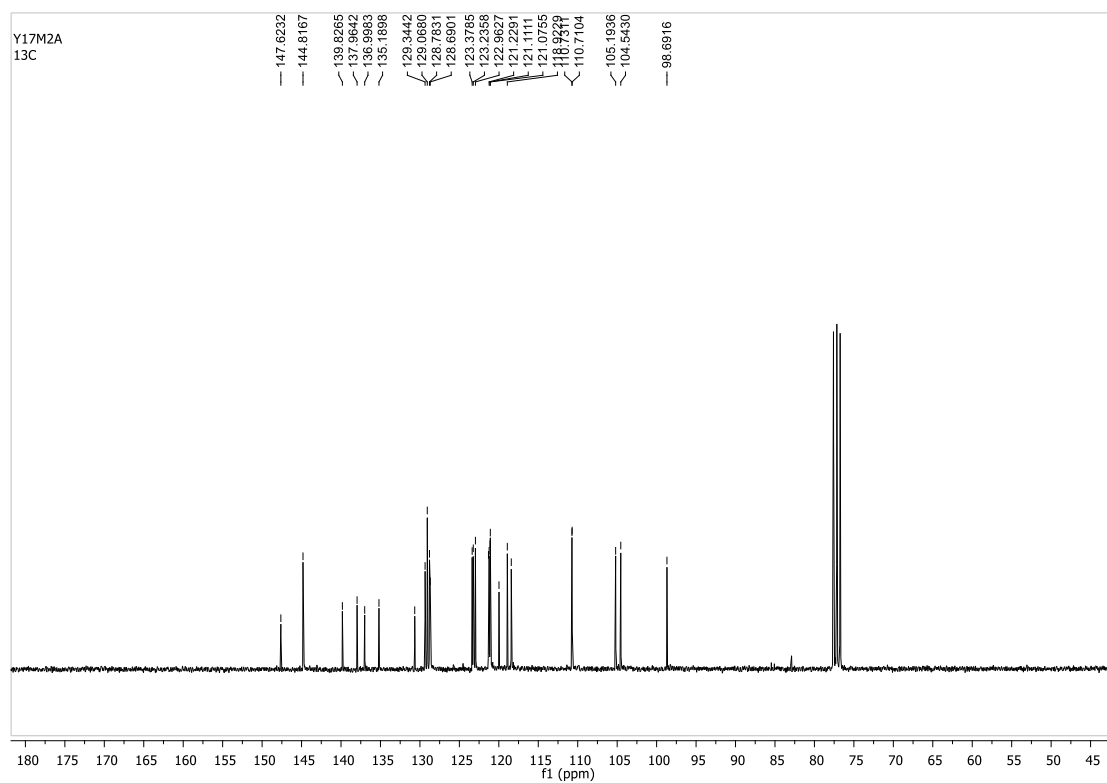

**Calculated values of the Gibbs energies  $\Delta G_{\text{acid}}$  [kJ·mol<sup>-1</sup>] for deprotonation**

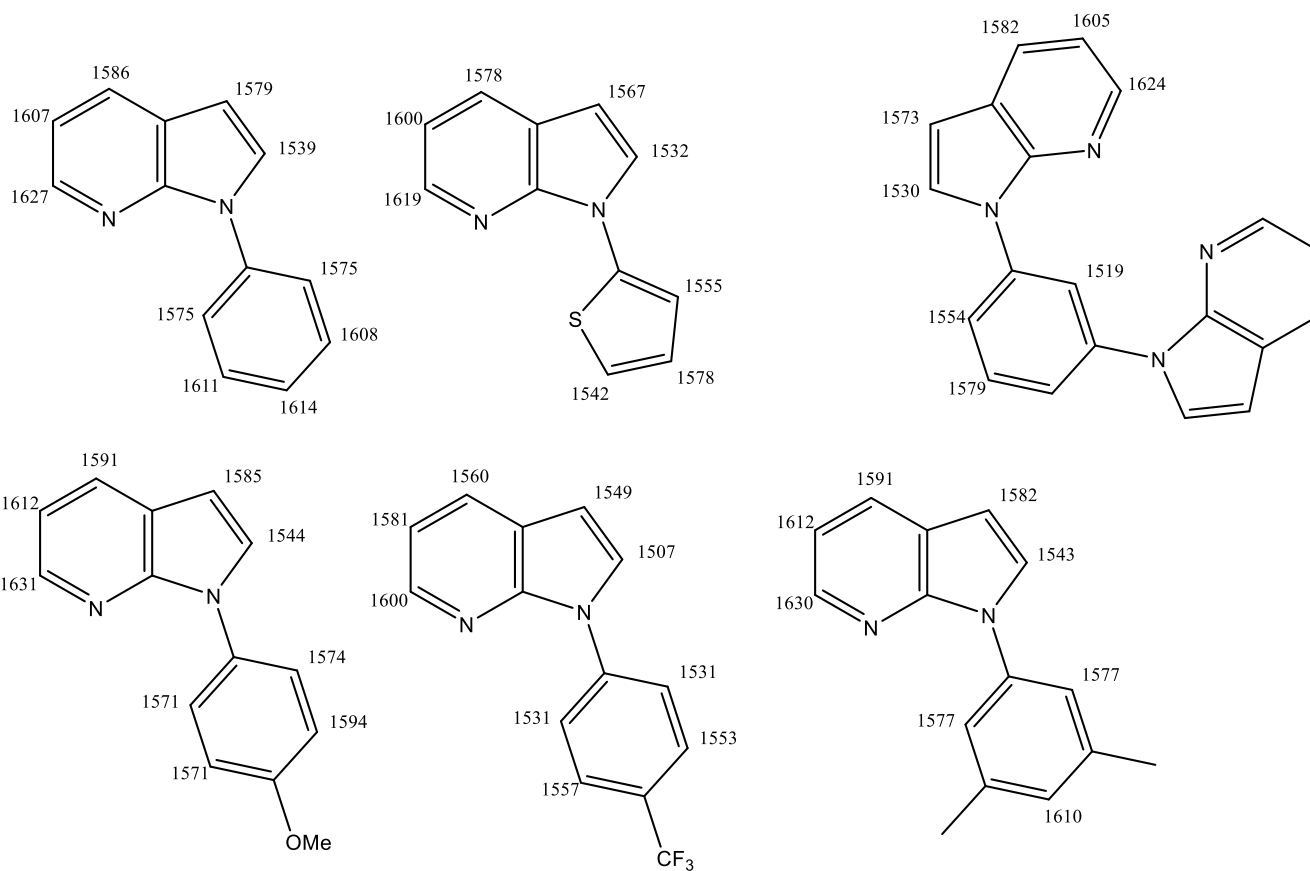

Supplement: s1 [file s1]
